# Supplementary material
Source: Elsevier journal article supplement (https://www.researchgate.net/publication/319320941_Supplementary_Material/data/59a454f6aca272a6461bbf1f/mmc1.pdf?origin=scientificContributions)
Supplement: mmc1 [file mmc1.pdf]

## Supplementary Data – Figures

**Figure S1.** CCDC170 does not colocalize with markers for mitochondria, endosomes, lysosomes and endoplasmic reticulum.

**Figure S2.** Untagged CCDC170 shows similar localization to the N-terminal GFP fusion.

**Figure S3.** GFP-tagged CCDC170 localizes with Golgi cisternae-like structures.

**Figure S4.** Localization and expression of endogenous CCDC170 in breast cells.

**Figure S5.** Endogenous CCDC170 is associated with MT in MCF-10F.

**Figure S6.** HeLa or U2OS cells were transfected with the indicated GFP-CCDC170 constructs.

**Figure S7.** CCDC170 overexpression promotes elongation or fragmentation of the Golgi ribbon structures in CCDC170-inducible MCF-7 Tet-On cells.

**Figure S8.** Ac- $\alpha$ -tubulin levels are decreased in MCF-7 *CCDC170*<sup>-/-</sup> cells.

**Figure S9.** Co-staining of ac- $\alpha$ -tubulin and  $\alpha$ -tubulin in the CCDC170-expressing cells.

**Figure S10.** CCDC170 protein levels affect the rate of 2D cell migration.

**Figure S11.** CCDC170 mediates Golgi-associated cell migration in U2OS cells.

**Figure S12.** Evidence that centrosome polarization might be defective in CCDC170-overexpressing cells.

**Figure S13.** Detection of CCDC170-interacting protein partners by BioID.

**Figure S14.** CCDC170 co-localizes with AKAP9.

## Supplementary Data – Tables

**Table S1.** DASE analysis at the *CCDC170/C6orf97-ESR1* locus ( $P < 0.05$ )

**Table S2.** Stratification of BioID hits based on filtering potential contaminants

**Table S3.** Final BioID hits

**Figure S1. CCDC170 does not colocalize with markers for mitochondria, endosomes, lysosomes and endoplasmic reticulum.** GFP-CCDC170 localization was examined in HeLa cells for each of four organelle marker (in red): anti-AIF(mitochondria), anti-EEA1(endosomes), LysoTracker (lysosomes), and anti-calreticulin (endoplasmic reticulum). The nuclei are shown in blue (DAPI) as a reference. For the mitochondrial and endosome markers, antibodies from the Organelle Localization IF Antibody Sampler Kit (Cell Signaling Technology, #8653) were used at the recommended dilutions. For lysosome detection, LysoTracker Red (Invitrogen/Molecular Probes) was used. For the endoplasmic reticulum marker, anti-calreticulin (abcam ab92516) was used at the recommended dilution.

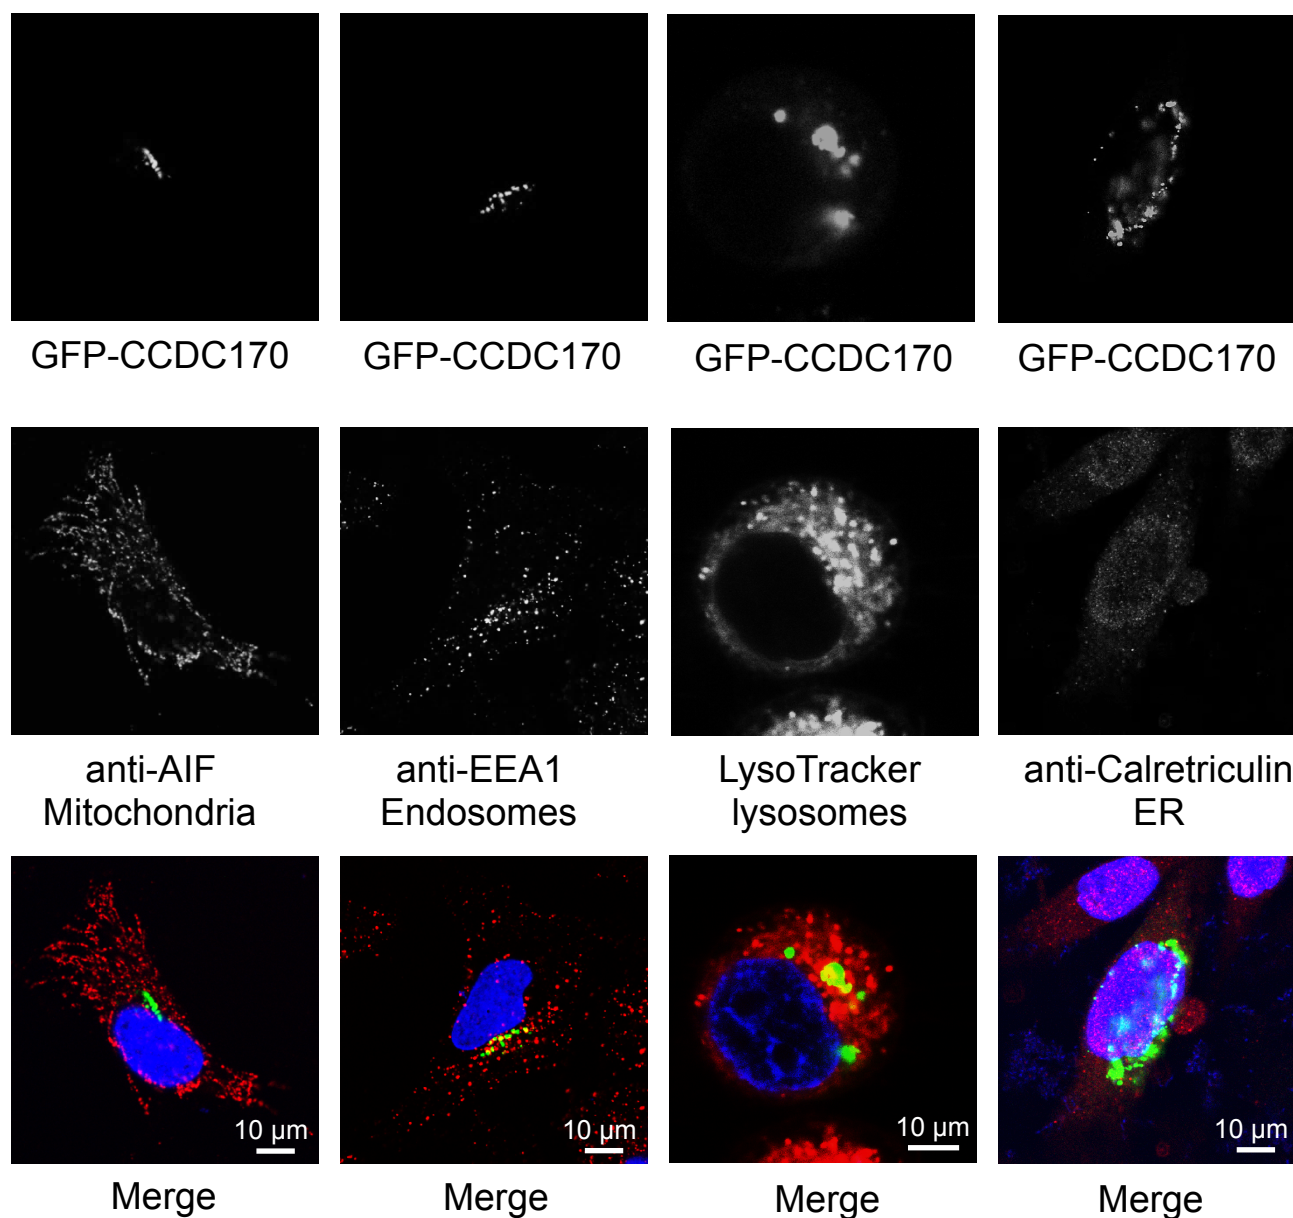

**Figure S2. Untagged CCDC170 shows similar localization to the N-terminal GFP fusion.** HeLa cells were transfected with either N-GFP-CCDC170 or untagged CCDC170. The untagged protein was detected using anti-CCDC170 (abcam, # ab97814) and goat anti-rabbit secondary (red) (Alexa 594 conjugated, Cell Signaling #8889).

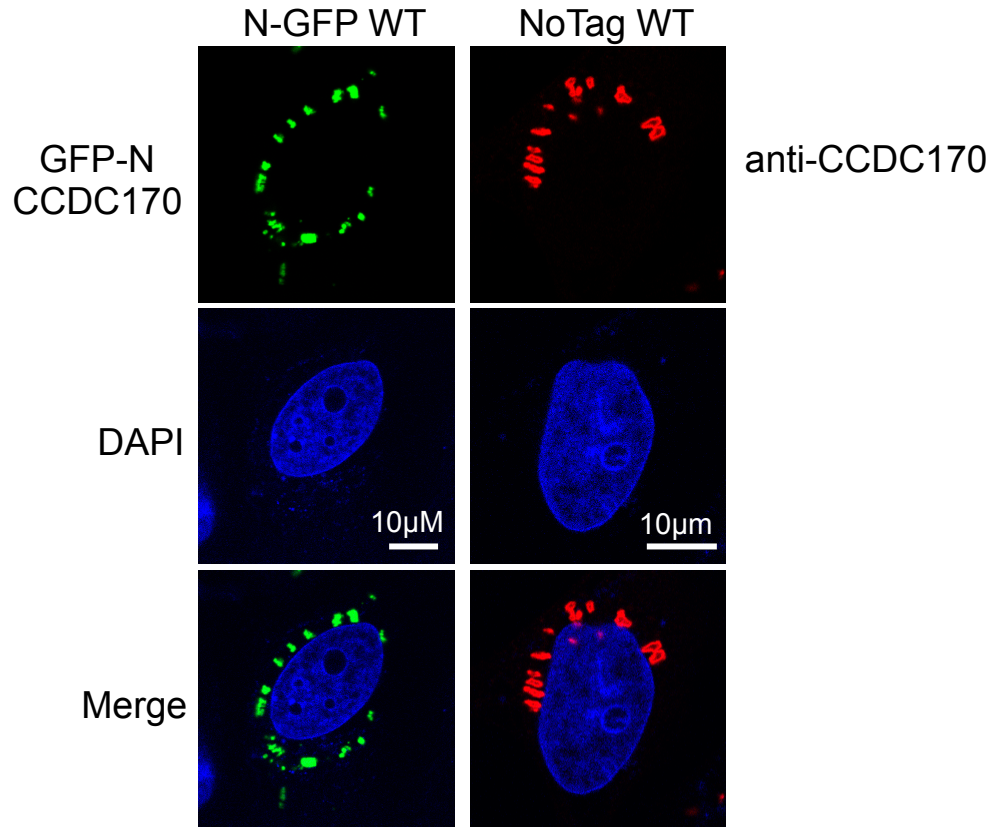

**Figure S3. GFP-tagged CCDC170 localizes with Golgi cisternae-like structures.** Localization of CCDC170 was examined by EM in HeLa cells transiently expressing GFP-CCDC170. GFP-tagged CCDC170 localized with Golgi cisternae-like structures. Two examples are shown.

GFP-CCDC170

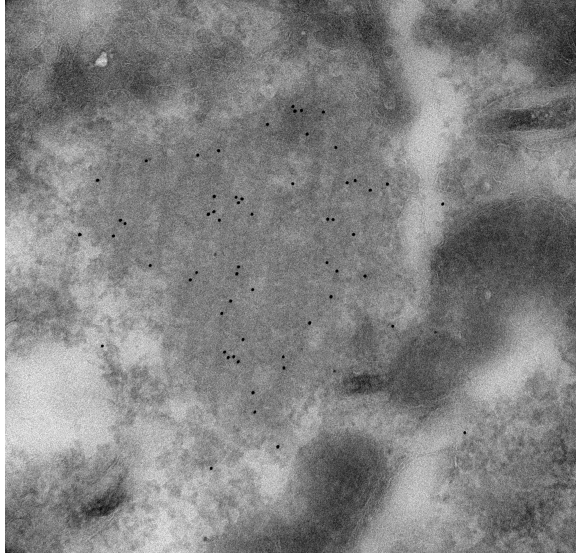

200 nm  
HV=120.0kV  
Direct Mag: 50000x  
AMT Camera System

GFP-CCDC170

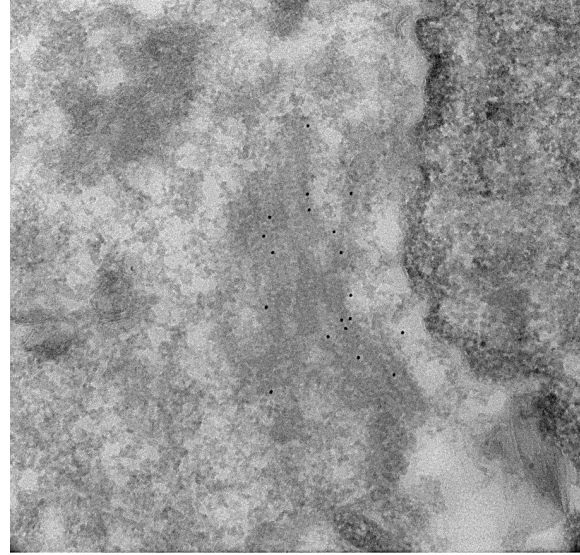

200 nm  
HV=120.0kV  
Direct Mag: 50000x  
AMT Camera System

**Figure S4. Localization and expression of endogenous CCDC170 in breast cells. a.** Evaluation of CCDC170 mRNA expression in two benign breast cell lines (MCF-10A and MCF-10F) and ten breast cancer cell lines by RT-PCR. **b.** Subcellular localization of endogenous CCDC170 in normal MCF-10A cells. Lectin-HPA was used to detect the Golgi. CCDC170 protein was detected using rabbit anti-CCDC170 (1:100, HPA027114, Sigma-Aldrich). **c.** Representative IF images of CCDC170 in ER+ breast cancer cells using rabbit anti-CCDC170, as in Panel B.

**a**

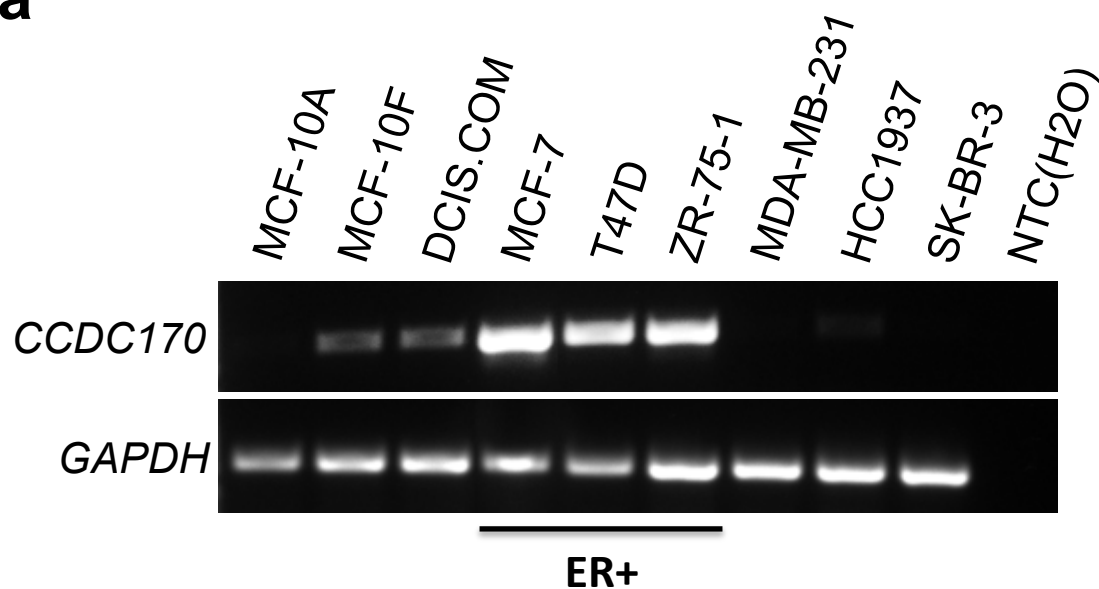

**b**

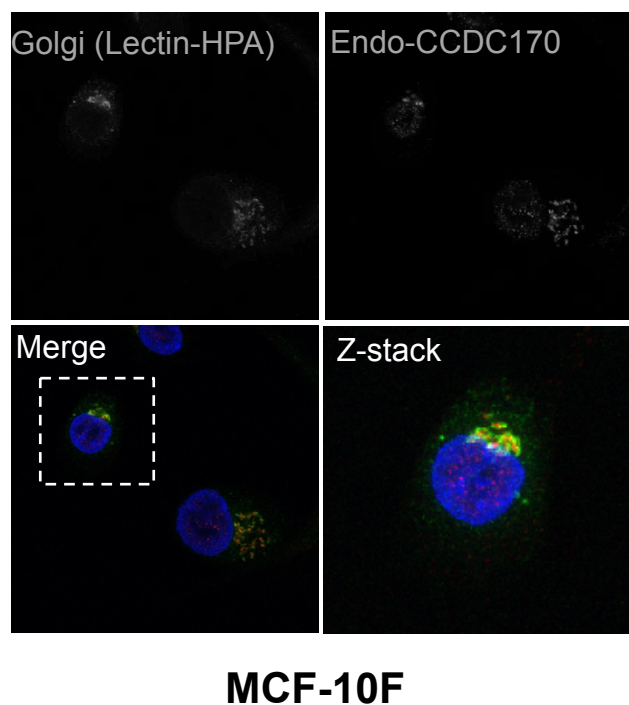

**c**

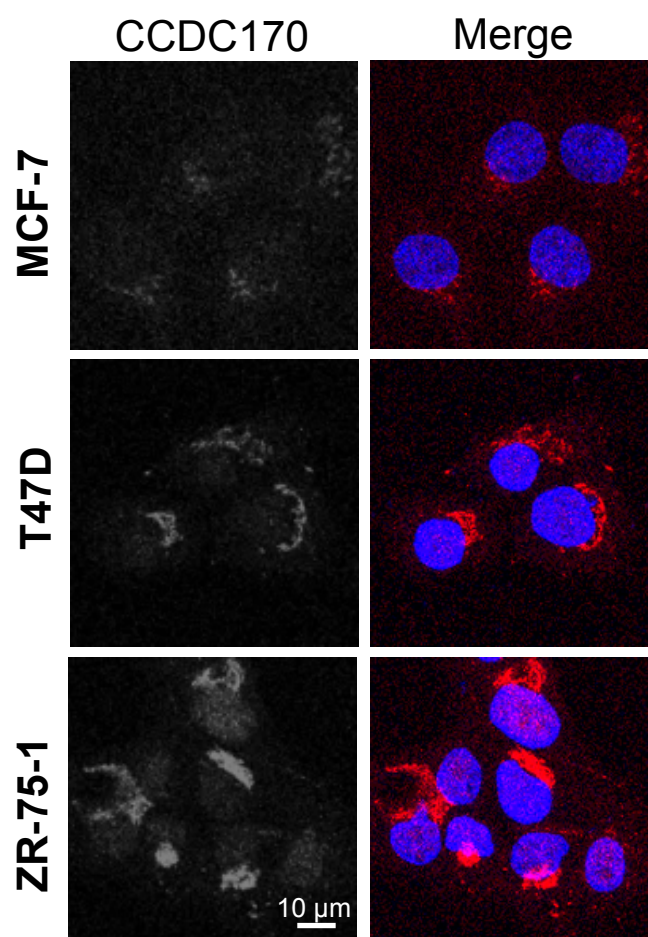

**Figure S5. Endogenous CCDC170 is associated with MT in MCF-10F.** MCF10F cells were fixed and stained with  $\alpha$ -tubulin (red) and CCDC170 (green) antibodies (#T5168, Sigma-Aldrich and HPA027114, Sigma-Aldrich, respectively). In addition to Golgi localization (**Figure S4b**), endogenous CCDC170 associates with MTs. As is the case with CCDC165, we also noted some apparent accumulation at the cell periphery (Sato et al, 2014).

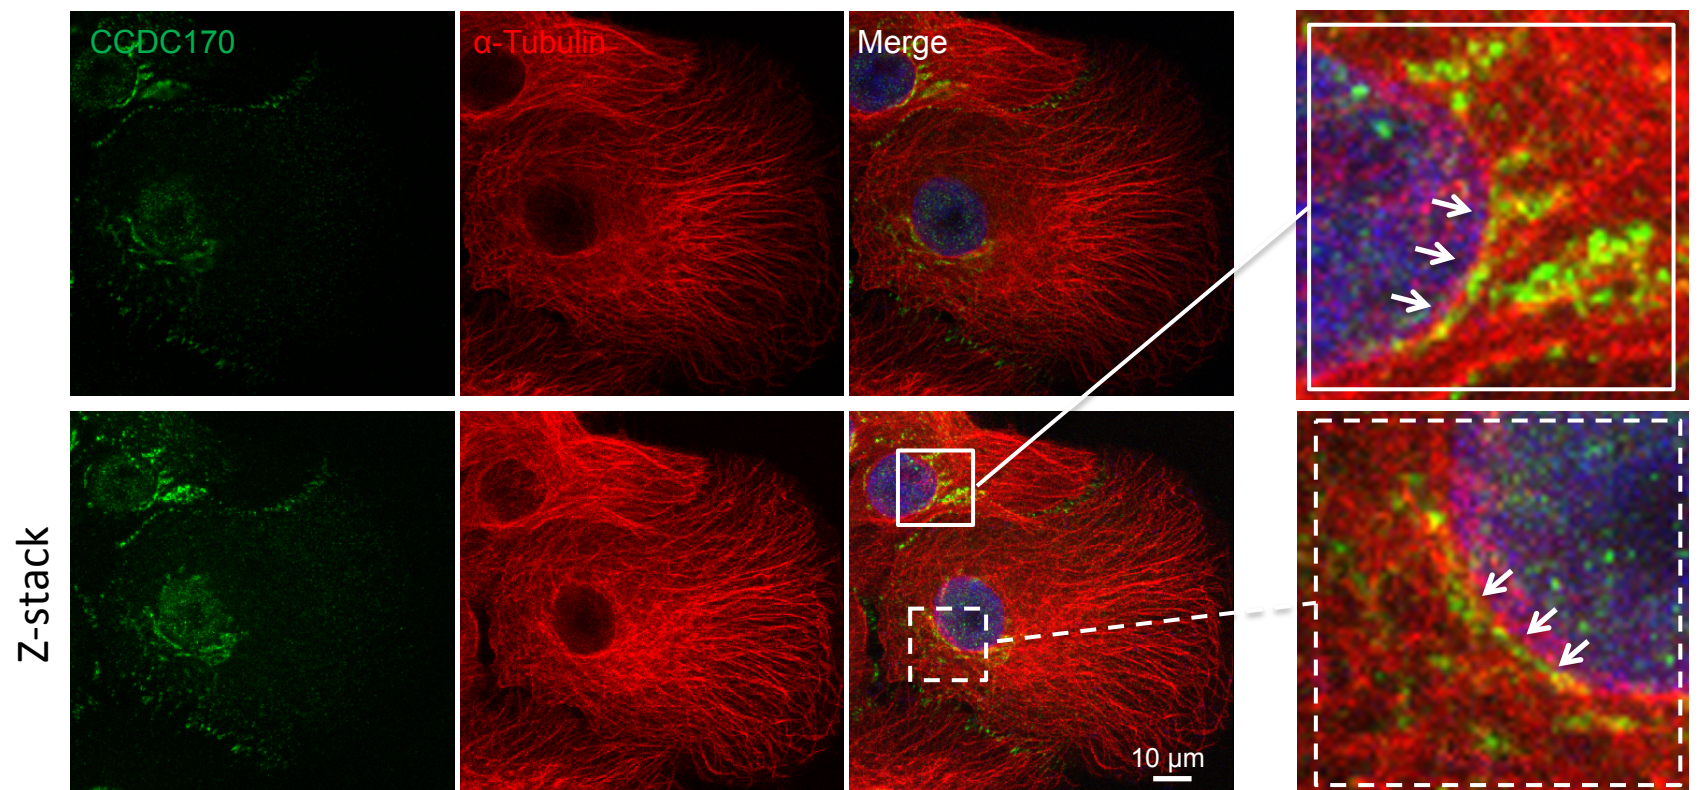

**Figure S6.** HeLa or U2OS cells were transfected with the indicated GFP-CCDC170 constructs. Cells were fixed and stained with anti-tubulin. Confocal imaging was carried out as described in the Methods.

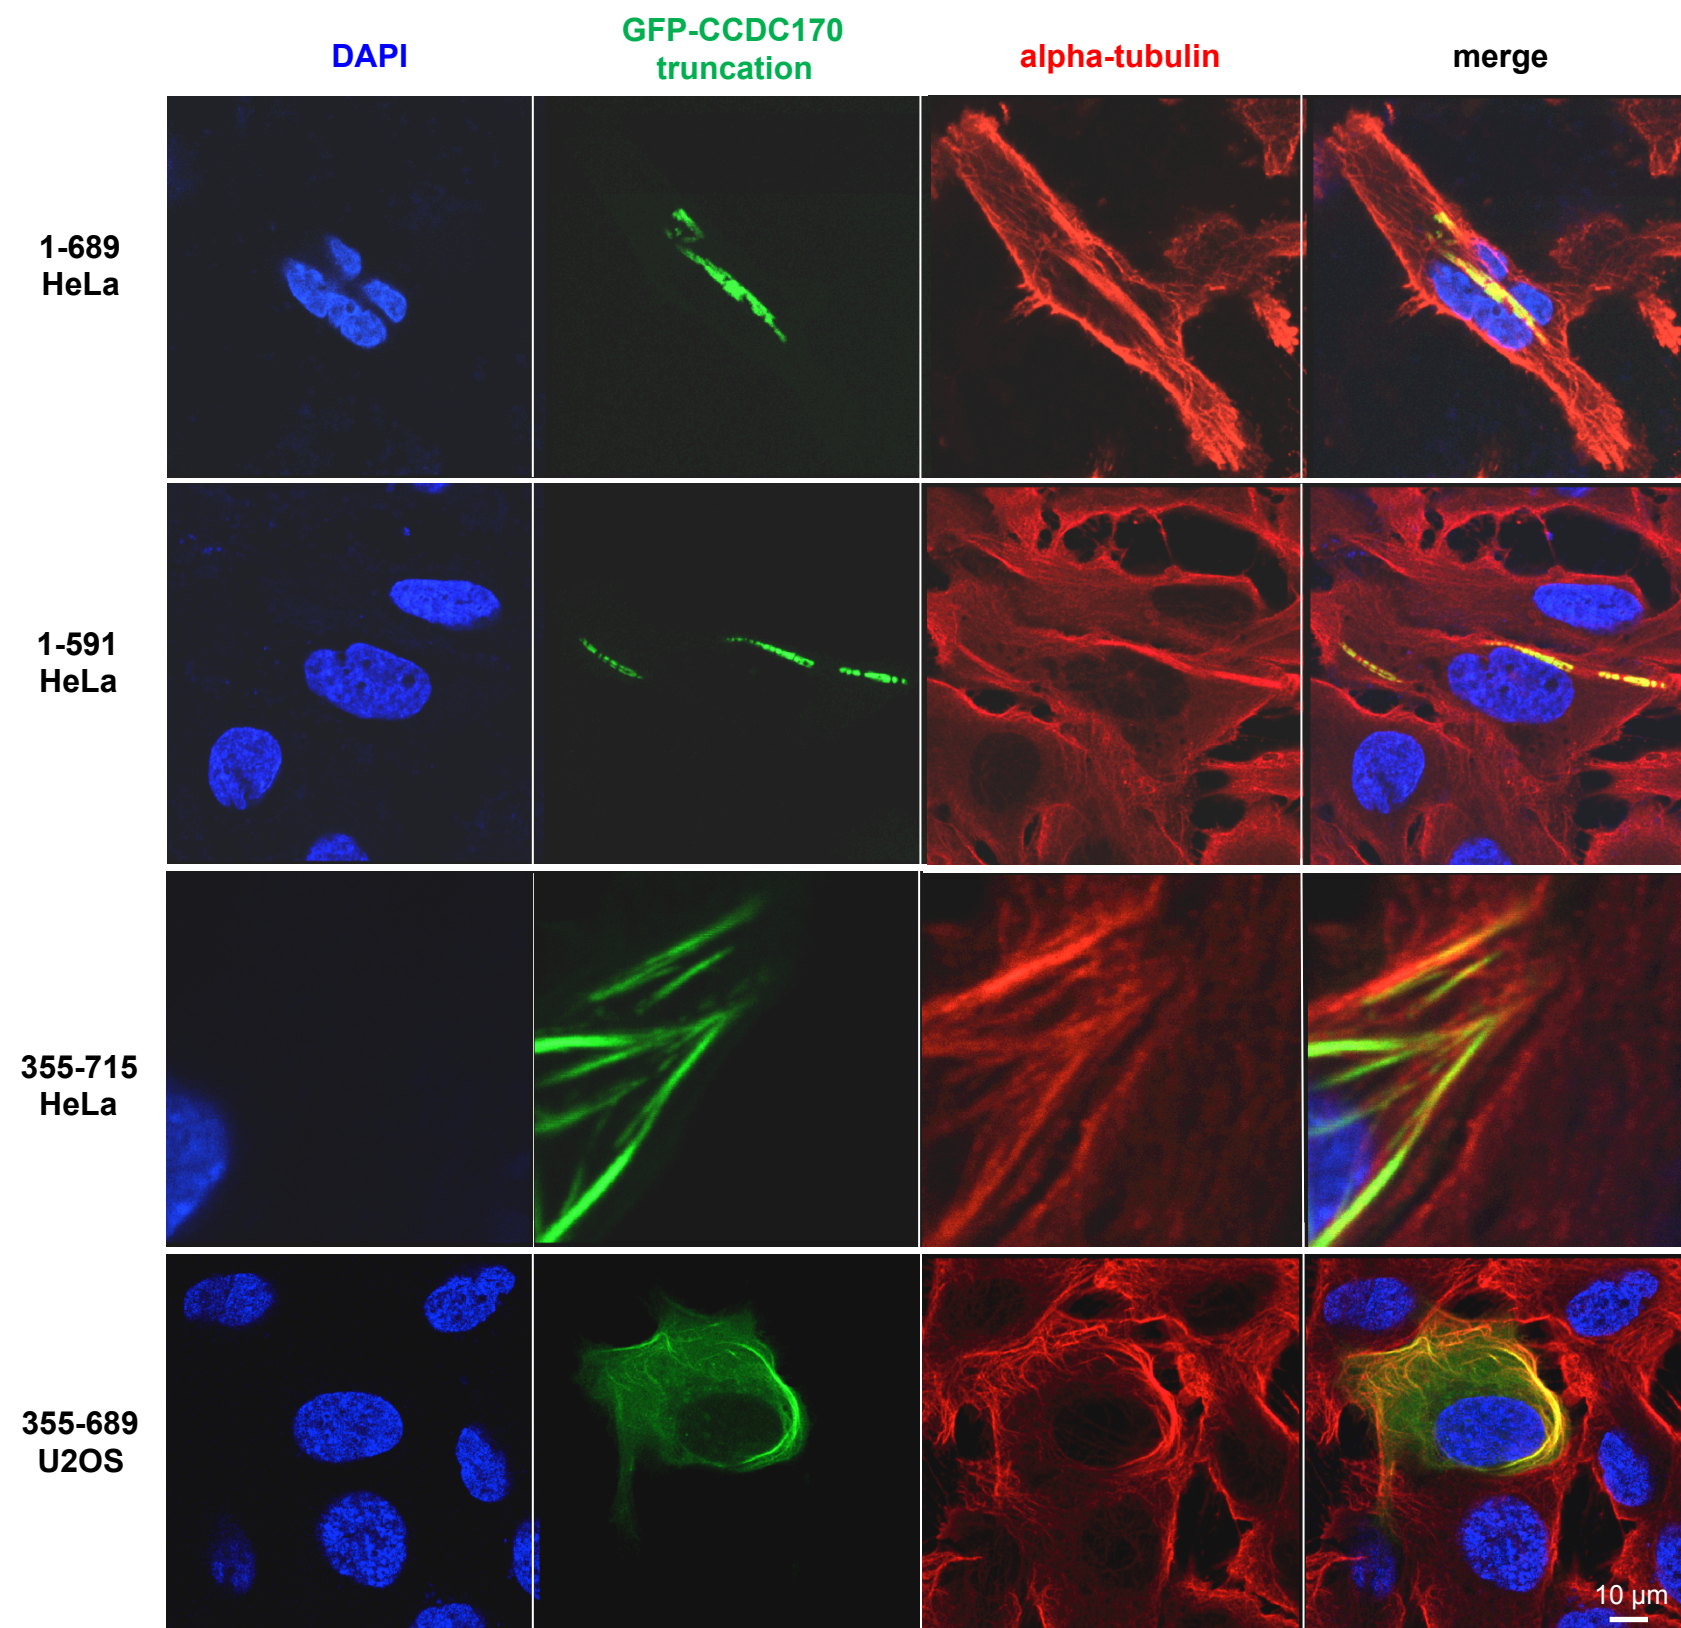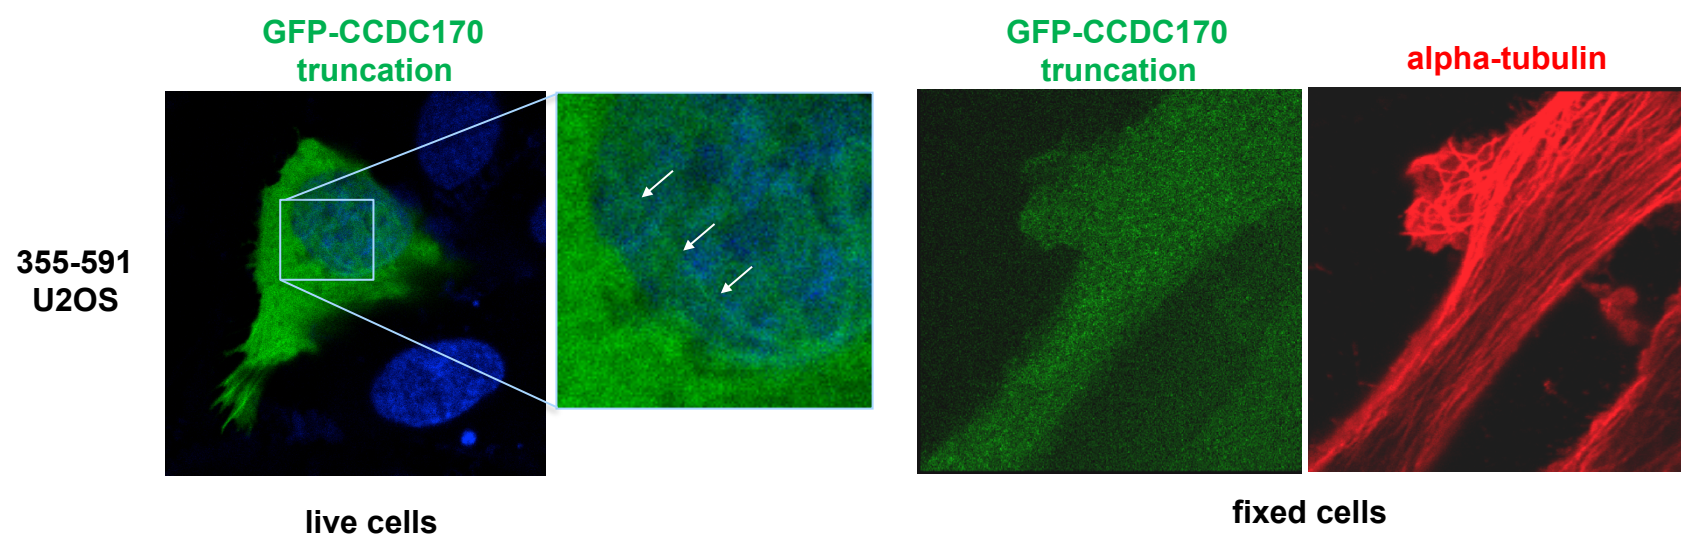



**Figure S7. CCDC170 overexpression promotes elongation or fragmentation of the Golgi ribbon structure in CCDC170-inducible MCF-7 Tet-On cells.** **a.** To examine whether overexpression of GFP-CCDC170 promoted reorganization of the Golgi, inducible MCF-7 Tet-On cells expressing GFP-CCDC170 or truncated forms (355-715, and 593-715) were treated with doxycycline at 500ng/ml. Non-fused GFP was used as a negative control. The angle of Golgi spreading was observed by staining with anti-RCAS1. **b.** Graph shows the distribution of cells with different ranges of Golgi ribbon angle ( $\Theta$ :  $0^\circ$  -  $360^\circ$ ) with respect to expression of non-fused GFP, GFP-CCDC170, GFP-593-715 and GFP-355-715 [n=100 for each construct; vs. non-fused GFP ( $180^\circ$ - $360^\circ$ ); \*:  $P < 0.01$ , \*\*:  $P < 0.001$ ].

**a**

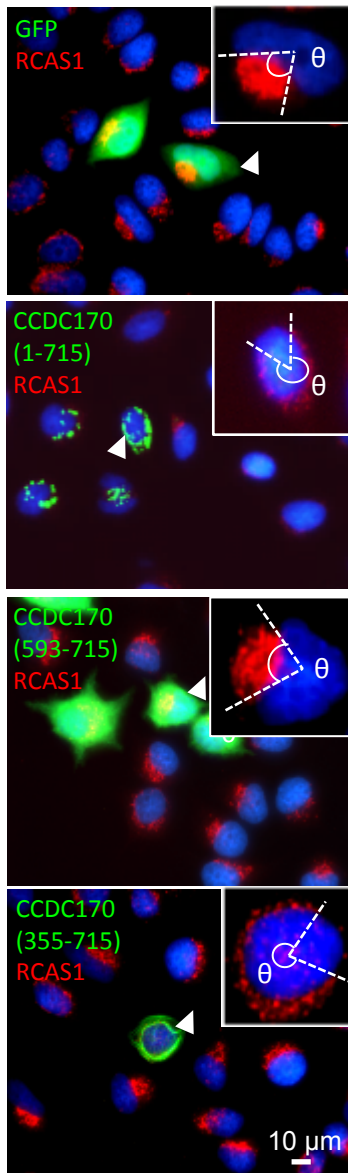

**b**

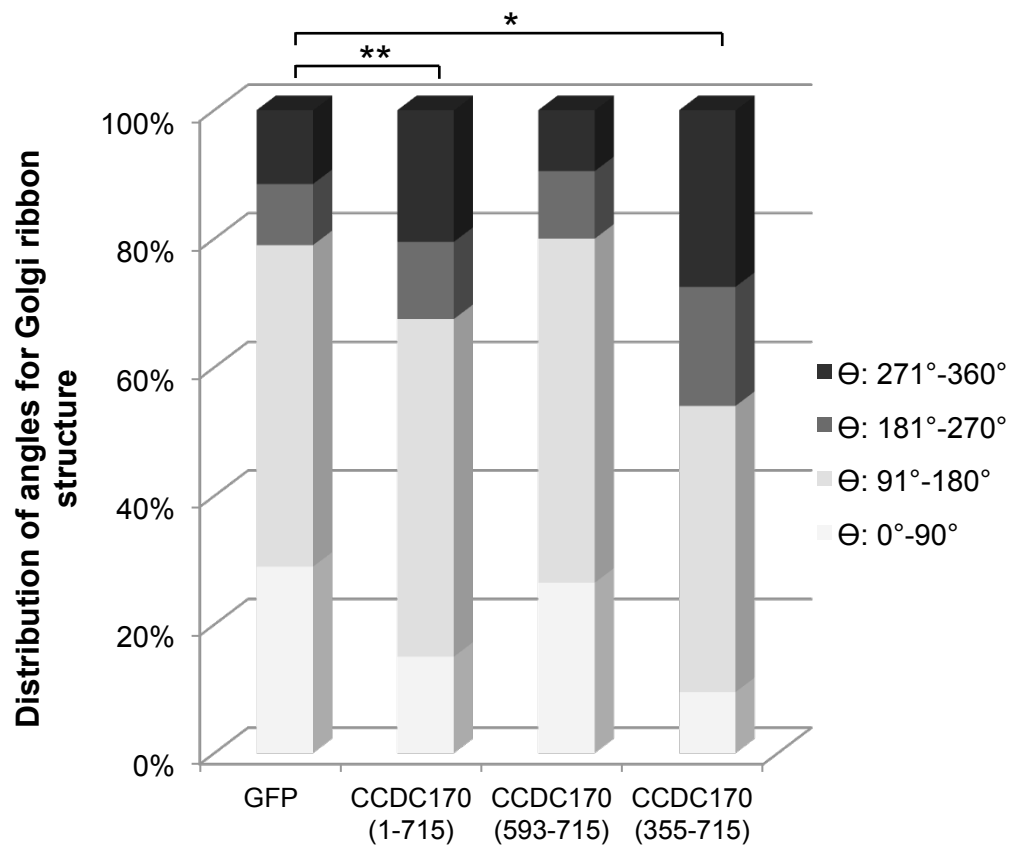

**Figure S8. Ac- $\alpha$ -tubulin levels are decreased in MCF-7 *CCDC170*<sup>-/-</sup> cells. a.** *CCDC170* knock-out MCF-7 cells were generated using CRISPR/Cas9 technology. The presence of out-of-frame insertions/deletions (indels) in *CCDC170* alleles, was assessed and verified by Sanger DNA sequencing. The cell clone shown has a single C insertion at both alleles. **b.** Representative images show ac-a-tubulin staining of MCF-7-*CCDC170*<sup>+/+</sup> or *CCDC170*<sup>-/-</sup> cells. **c.** *CCDC170*, ac-tubulin, and alpha-tubulin levels were examined by SDS-PAGE/immunoblot analysis.

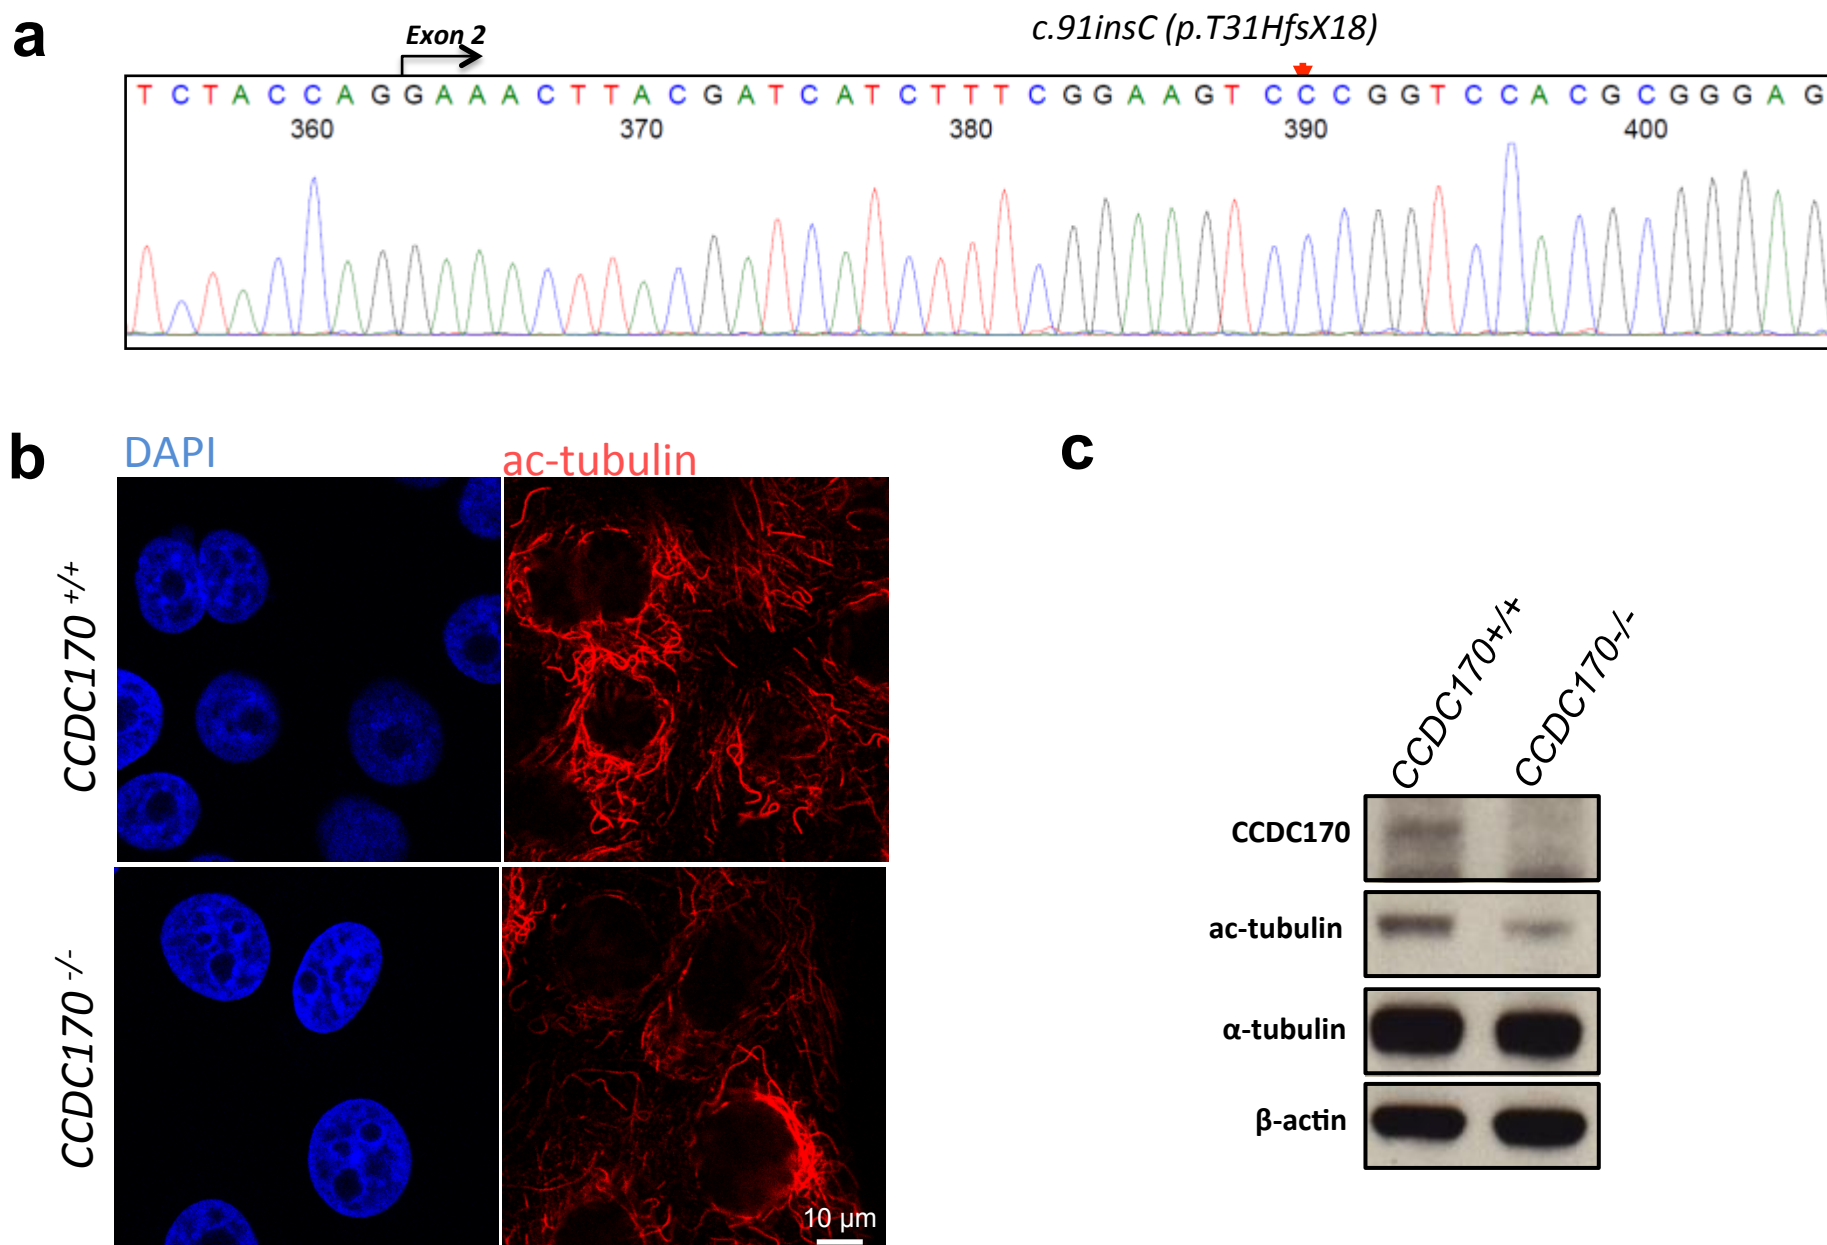

**Figure S9. Co-staining of ac- $\alpha$ -tubulin and  $\alpha$ -tubulin in the CCDC170-expressing cells.** HeLa cells were transfected with GFP-CCDC170 and after 20 hours were treated with nocodazole for four hours to depolymerize MTs and observe potential CCDC170-induced resistance to nocodazole-induced MT depolymerization. Cells were then fixed and stained with anti-GFP (green), anti- $\alpha$ -tubulin (red) or anti-ac- $\alpha$ -tubulin (purple). The GFP-CCDC170,  $\alpha$ -tubulin, and ac- $\alpha$ -tubulin signals largely overlapped. The  $\alpha$ -tubulin and ac- $\alpha$ -tubulin formed punctated segments corresponding to regions of punctated CCDC170 accumulation.

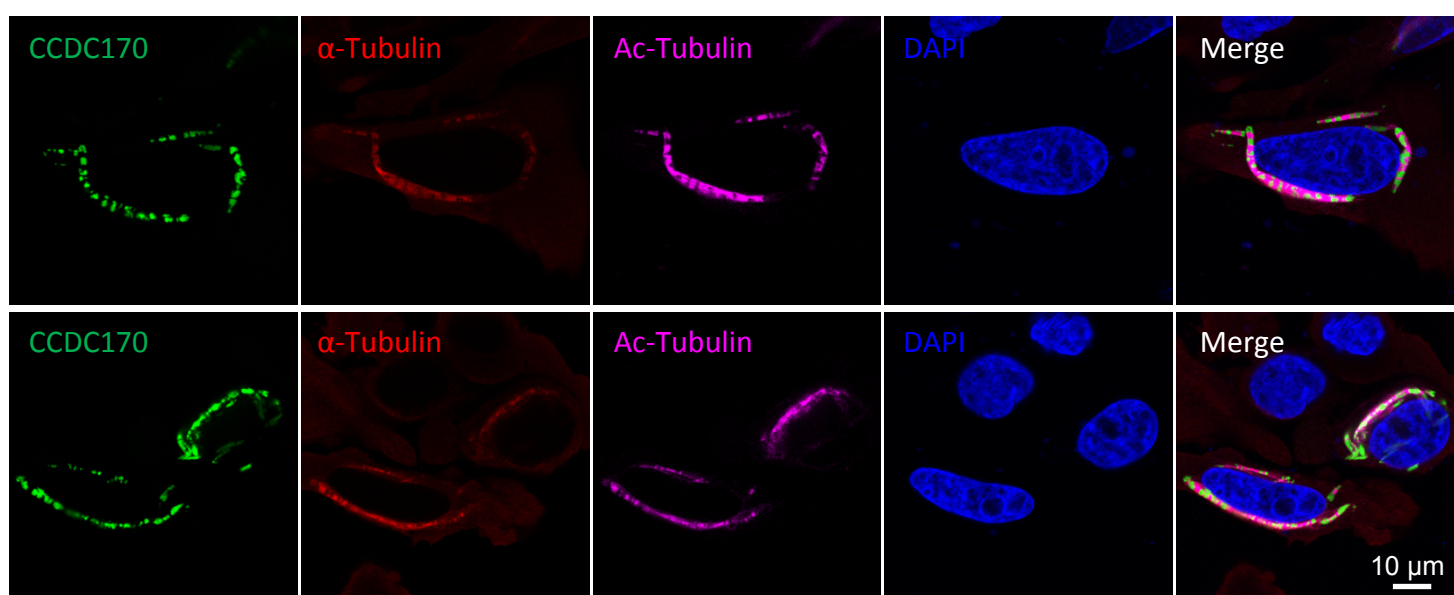

**Figure S10. CCDC170 protein levels affect the rate of 2D cell migration.** Cell migration was compared (see **Figure 6**) in MCF-7-*CCDC170*<sup>+/+</sup>, MCF-7-*CCDC170*<sup>+/-</sup>, and MCF-7-*CCDC1*<sup>+/-</sup> cells. Directional migration of each cell was quantified as the direct distance from start to end point and the average distances were measured by ImageJ (**a**) and compared by *t*-test (**b**) (n =50; \*: P<0.01, \*\*: P<0.001).

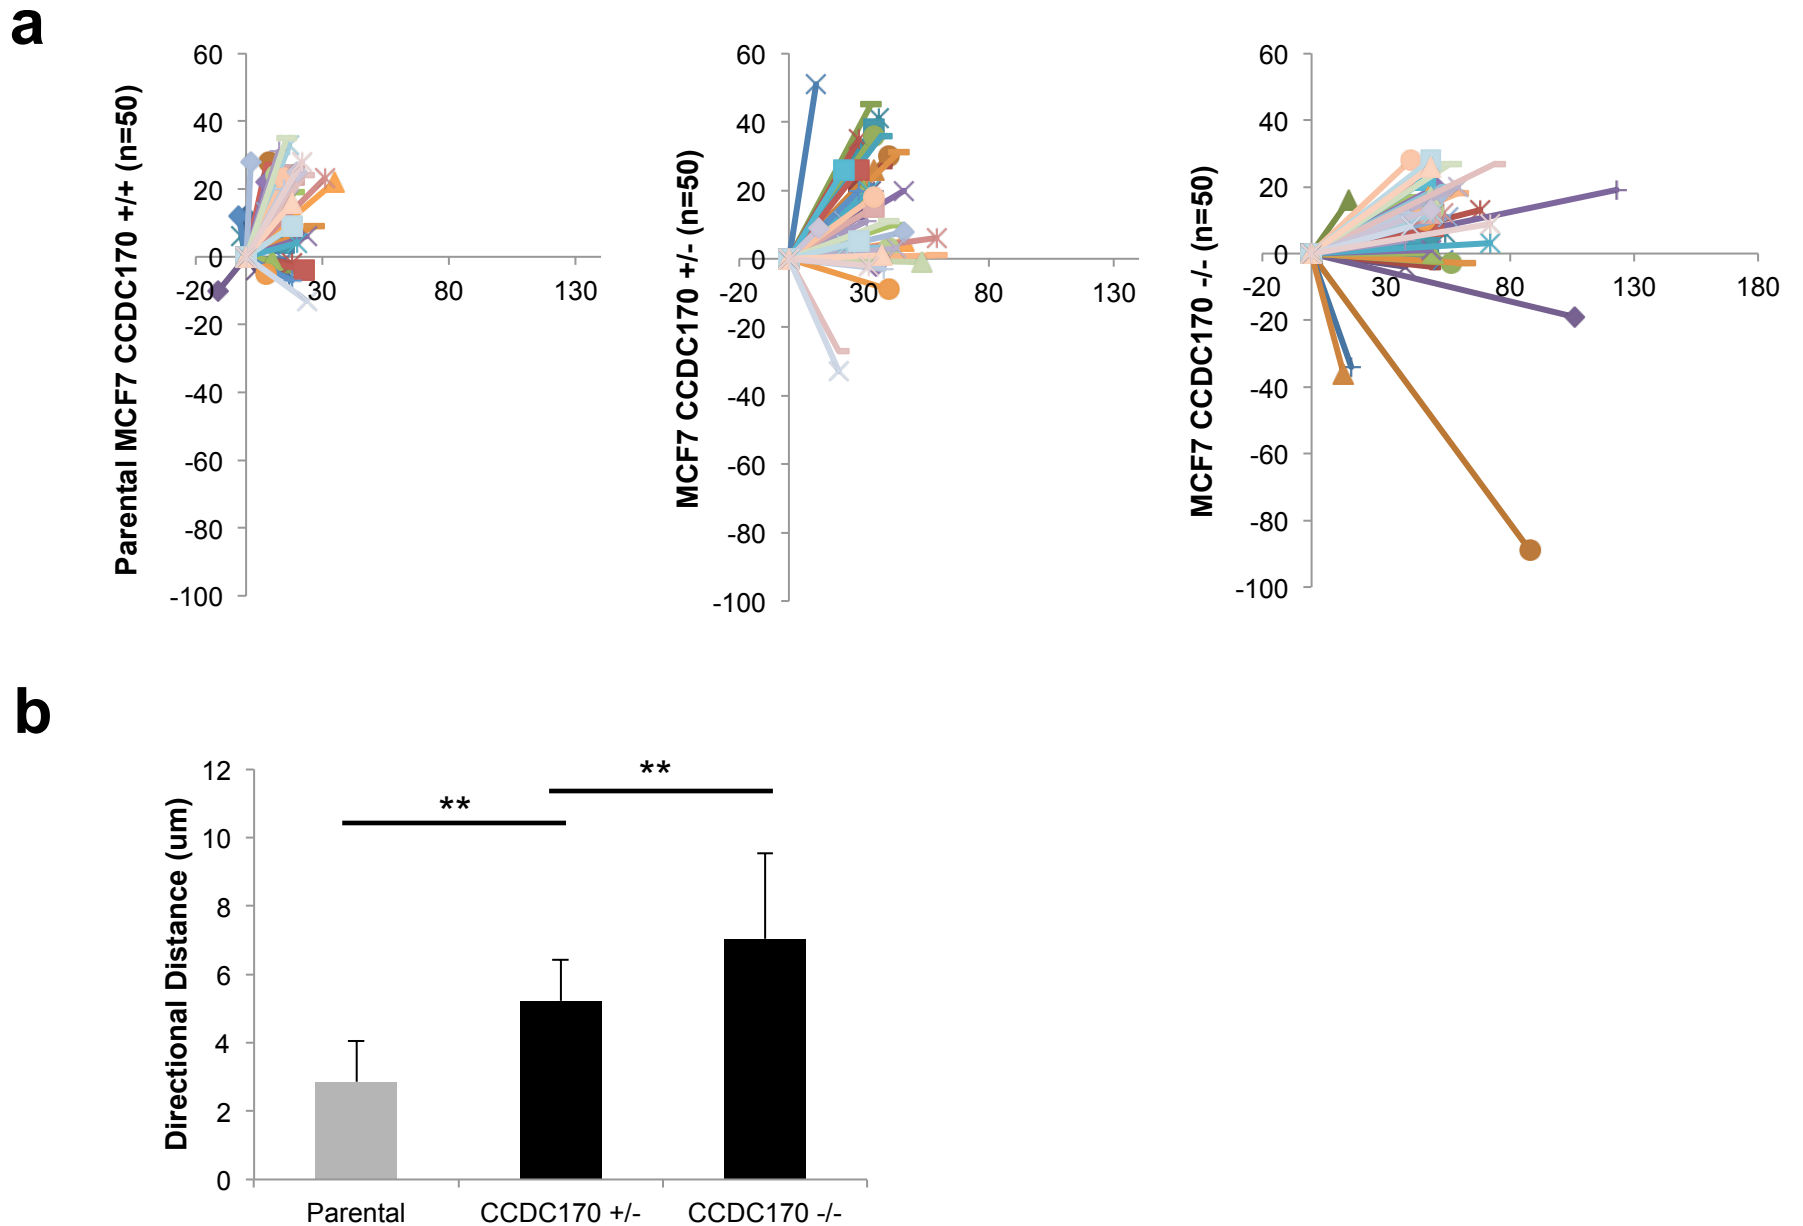

**Figure S11. CCDC170 mediates Golgi-associated cell migration in U2OS cells. a.** The relative wound closure of parental and GFP-CCDC170-expressing cells was quantified from 6 different fields for 72 hours. The images are representative of wound healing for each group. White dotted lines labeled the wound edges. **b.** The wound healing process was evaluated for 40 hours and the relative wound areas (vs. 0 h) are shown as mean  $\pm$ SD (n =3).

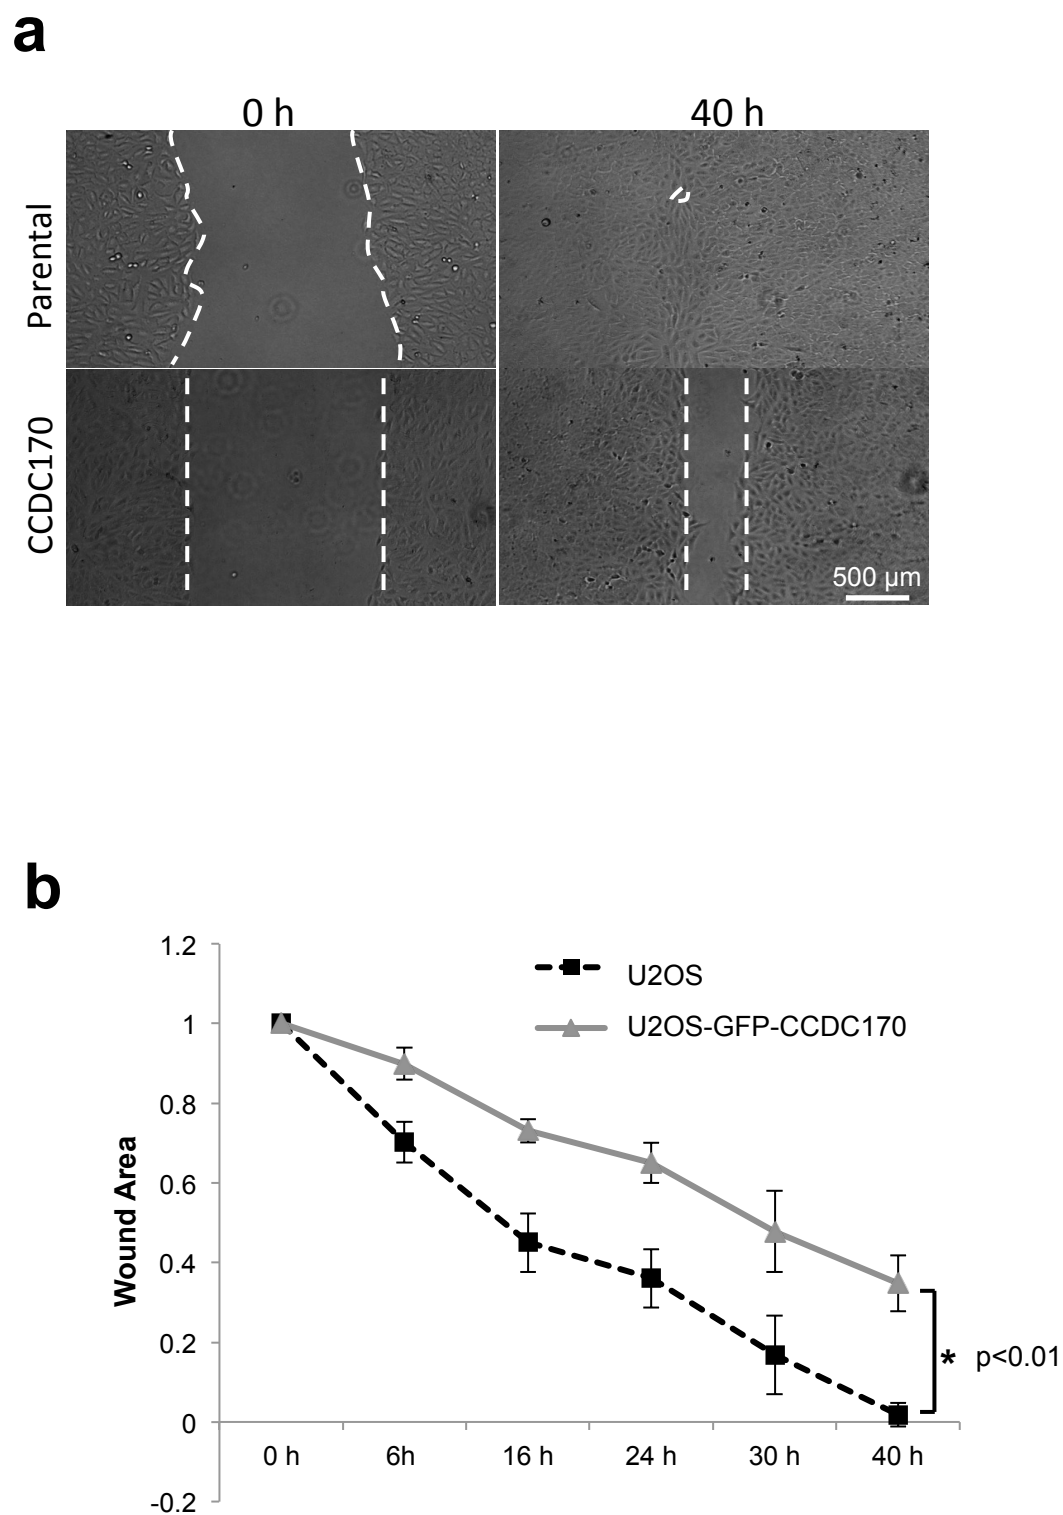

**Figure S12. Evidence that centrosome polarization might be defective in CCDC170-overexpressing cells.** **a.** The effects of CCDC170 on the positioning of the centrosome with respect to the migratory leading edge of the nucleus were examined using U2OS cells stably overexpressing GFP-CCDC170. Directional migration of U2OS cells was initiated by wounding the monolayer and directional migration is defined as facing the wound. After cells began migrating into the wound, the cells were fixed and stained with anti-tubulin (cell outline), anti-gamma-tubulin (centrosome), and DAPI (nucleus). The yellow arrows point toward the wound (directional cell migration), while the white arrow describes the center of the nuclear-centrosome axis. In parental migrating U2OS cells, the directional cell migration and nuclear-centrosome axis largely overlapped, and an angle of 0 to 90° between the two was defined as the normal range. An angle of greater than 90° was defined as an uncoupling of centrosome positioning at the leading edge of nucleus. The angle between was measured using Image J software. **b.** Quantitative results the distribution (%) of cells with different angles relative to direction of migration (\*: P<0.01). Parental cells were compared to GFP-overexpressing cells (left). High and low GFP-CCDC170-expressing cells were also compared (right).

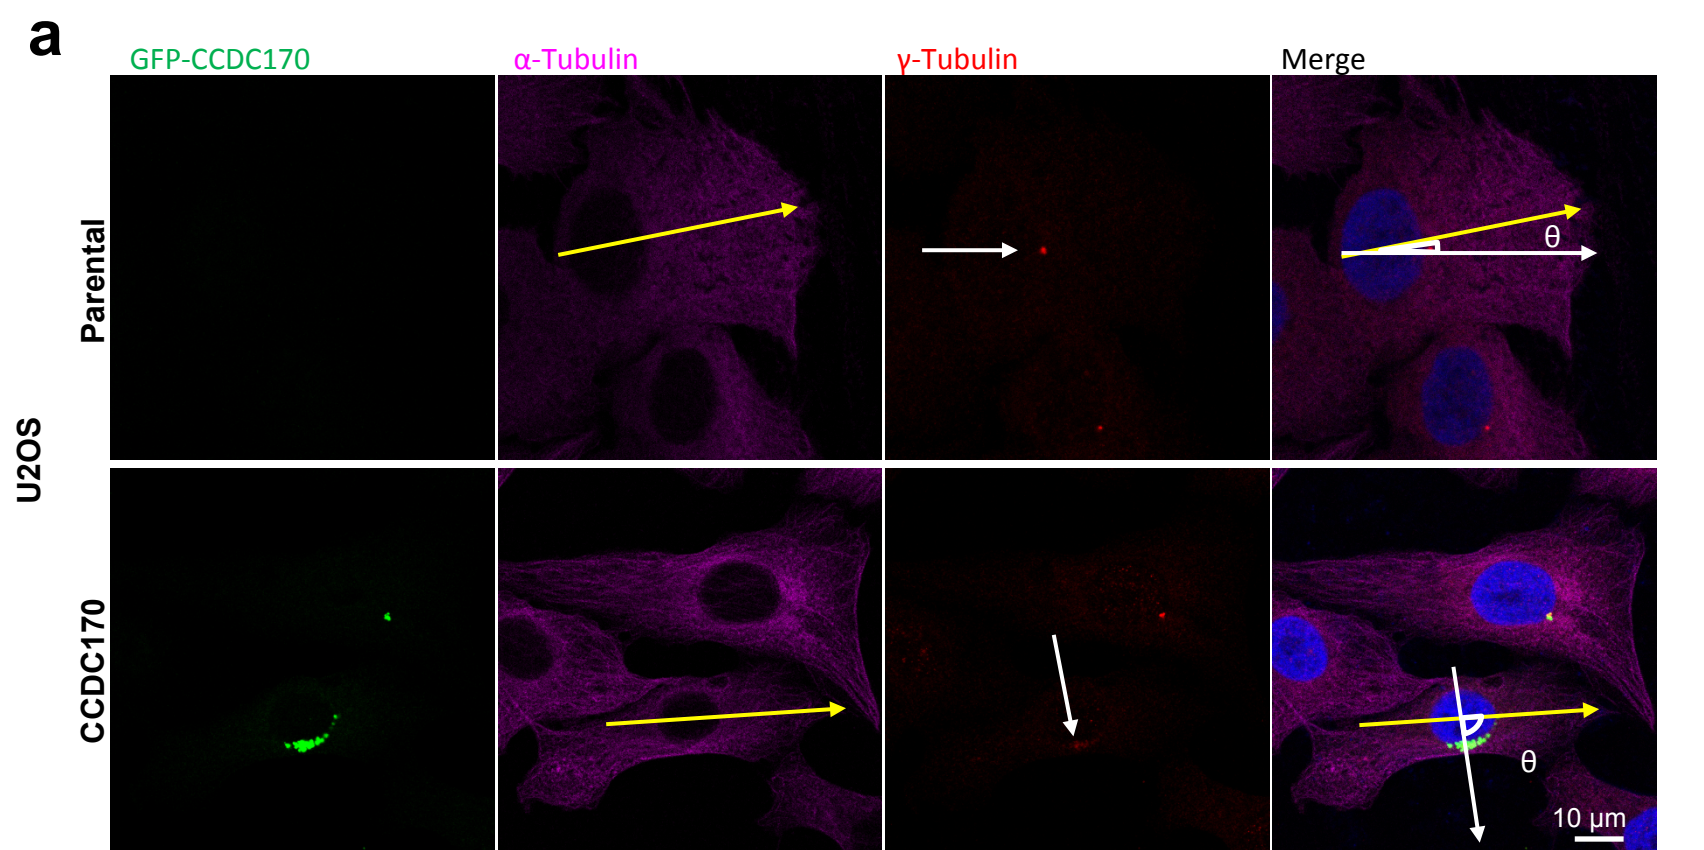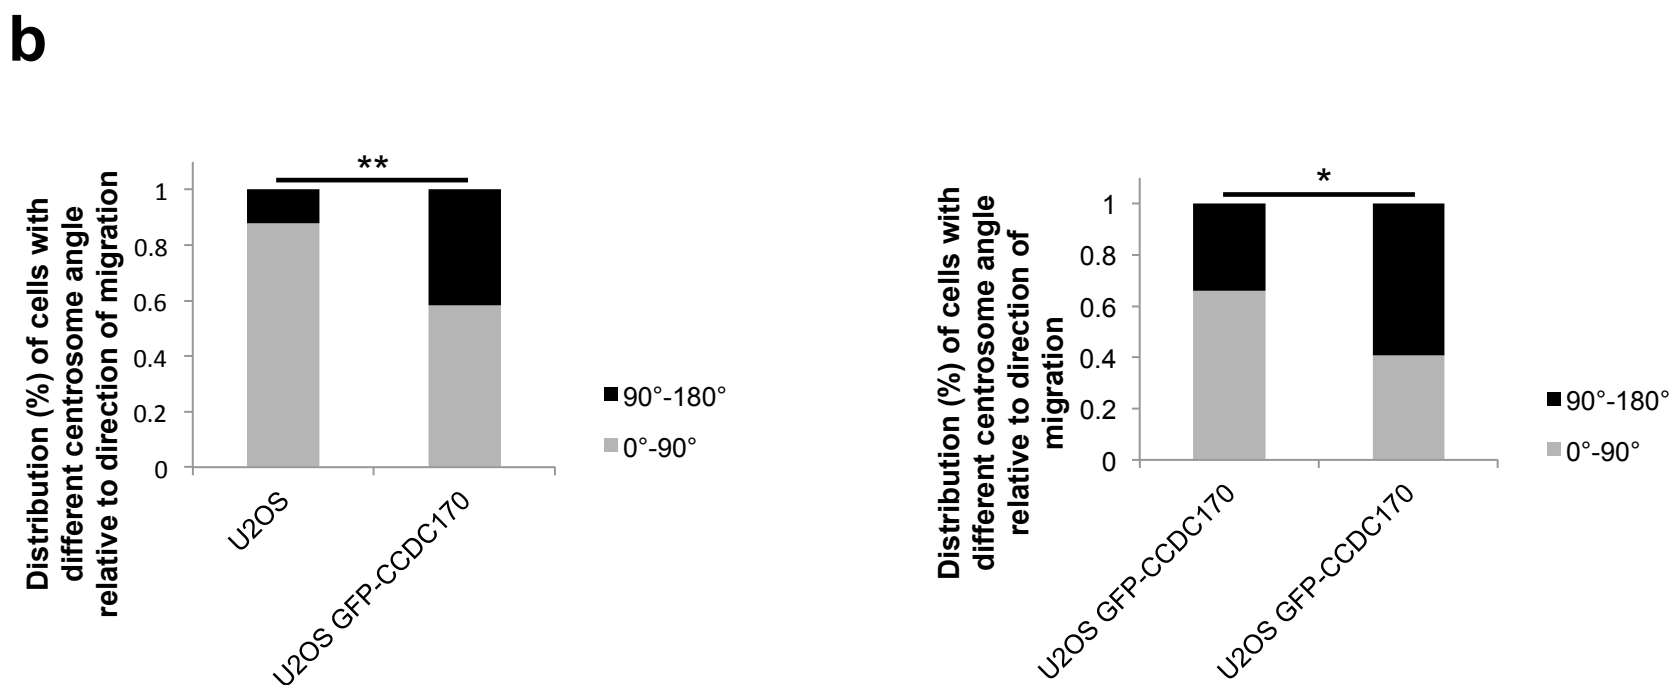

**Figure S13. Detection of candidate CCDC170-interacting protein partners by BiOLD.**

**a** Detection of biotinylated proteins after C-BirA\*-CCDC170 transfection by streptavidin western blot

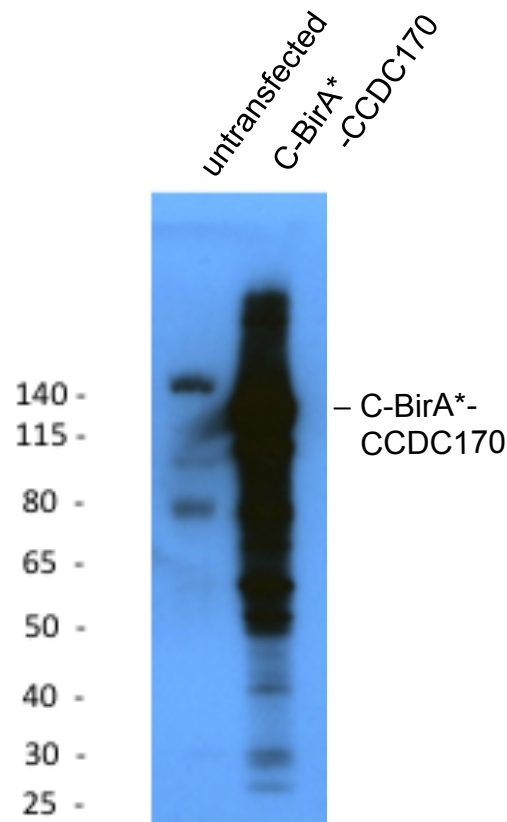

**b** Localization and biotinylation activity of C-BirA\*-CCDC170

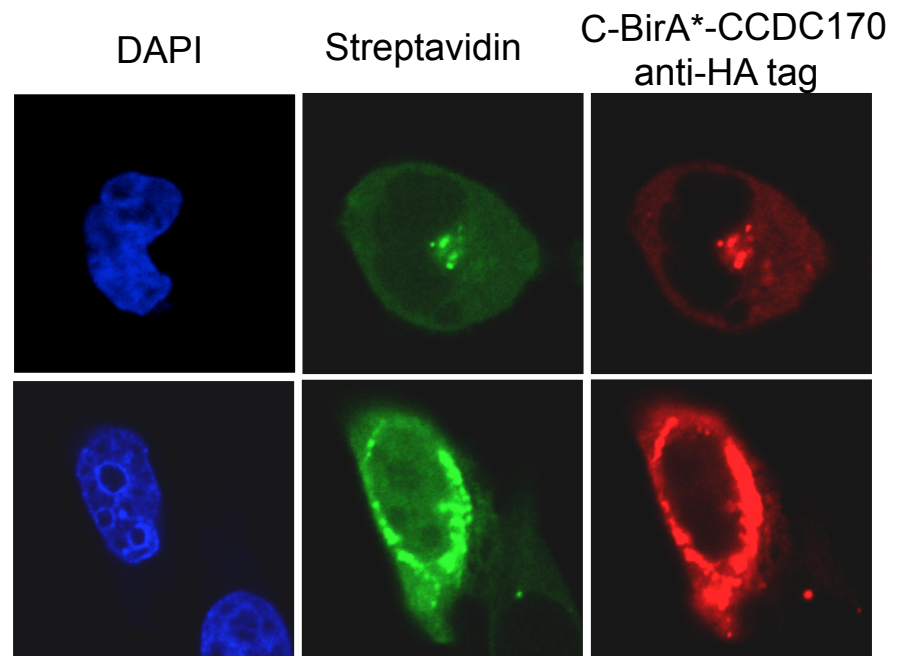

**c** BiOLD identification of candidate binding partners of CCDC170 in HeLa cells

**CCDC170 bait proteins transfected**

1. C-terminal BirA\* fusion
  2. C-terminal BirA\* fusion
  3. N-terminal BirA\* fusion
  4. Untransfected control
- } duplicate transfection

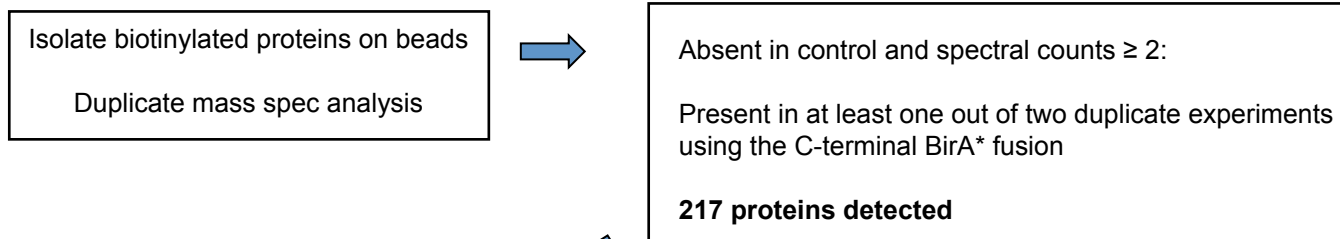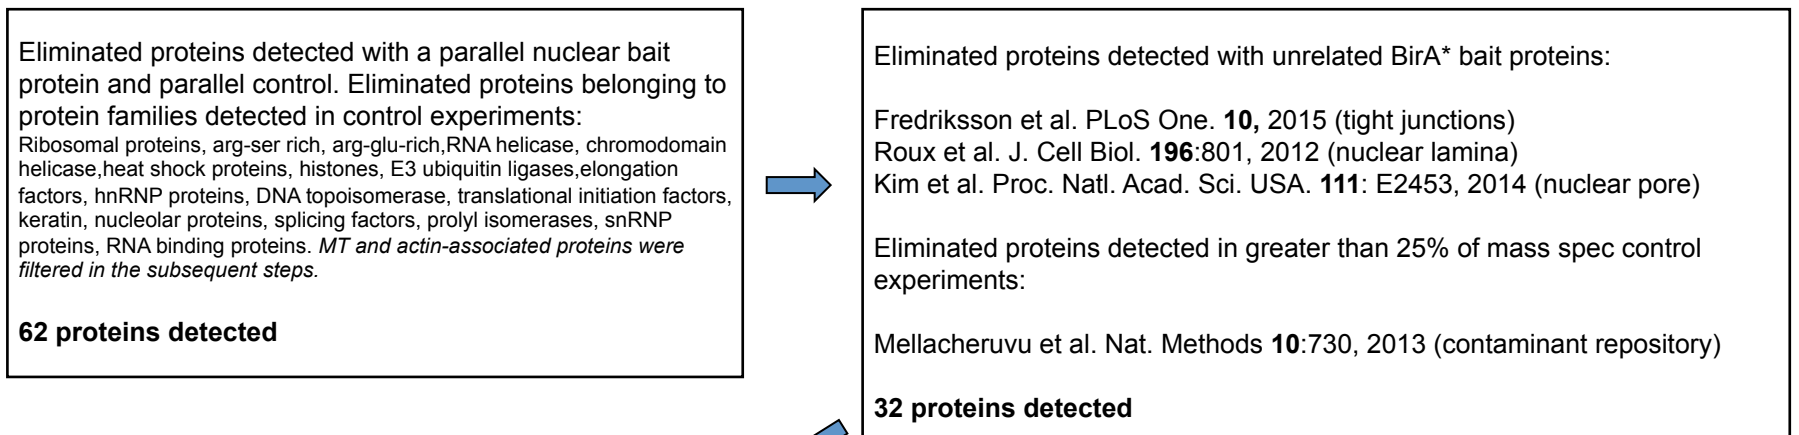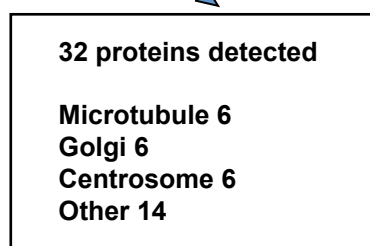

**Figure S14. CCDC170 co-localizes with AKAP9.** HeLa cells were transfected with GFP-CCDC170 and after 24 hours cells were fixed and AKAP9 was detected (red). Representative image shows that GFP-CCDC170 and AKAP9 partially co-localize in perinuclear regions.

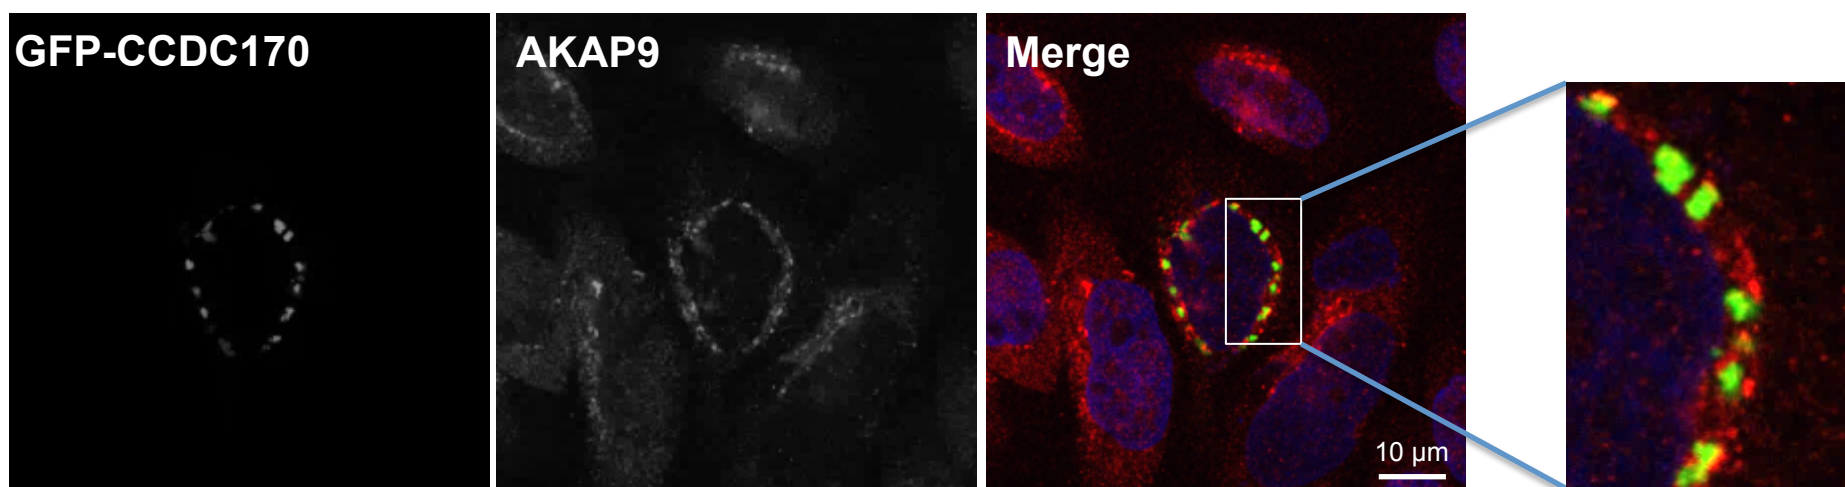



**Table S1: DASE analysis at the *CCDC170/C6orf97-ESR1* locus ( $P < 0.05$ )**

| <b>SNP</b>         | <b>Chr</b> | <b>GeneSymbol</b>      | <b>GeneLocation</b> | <b>DASE (Log2)</b> | <b>P-value</b> |
|--------------------|------------|------------------------|---------------------|--------------------|----------------|
| <i>rs4870034</i>   | 6          | <i>CCDC170/C6orf97</i> | CODING              | 1.136642433        | 8.39E-05       |
| <i>rs953767</i>    | 6          | <i>CCDC170/C6orf97</i> | CODING              | 0.590031636        | 0.023981986    |
| <i>rs12205837</i>  | 6          | <i>CCDC170/C6orf97</i> | CODING              | 2.342557529        | 0.017967093    |
| <i>rs6929137</i>   | 6          | <i>CCDC170/C6orf97</i> | CODING              | 1.301953718        | 0.020275714    |
| <i>rs3734804</i>   | 6          | <i>CCDC170/C6orf97</i> | CODING              | 1.179238392        | 0.002558726    |
| <i>rs3734805</i>   | 6          | <i>CCDC170/C6orf97</i> | UTR                 | 1.046868051        | 0.037197929    |
| <i>rs6932260</i>   | 6          | <i>CCDC170/C6orf97</i> | UTR                 | 1.150589227        | 0.001553989    |
| <i>rs6932603</i>   | 6          | <i>CCDC170/C6orf97</i> | UTR                 | 1.14750246         | 0.002603497    |
| <i>rs6906130</i>   | 6          | <i>CCDC170/C6orf97</i> | UTR                 | 1.161502999        | 0.003848164    |
| <i>kgp11470953</i> | 6          | <i>ESR1</i>            | UTR                 | 0.230758202        | 0.018936968    |
| <i>rs2077647</i>   | 6          | <i>ESR1</i>            | CODING              | 0.691217936        | 0.000178424    |
| <i>rs2228480</i>   | 6          | <i>ESR1</i>            | CODING              | 0.976295931        | 0.016562028    |
| <i>kgp6150604</i>  | 6          | <i>ESR1</i>            | UTR                 | 0.582381734        | 4.42E-05       |

**Table S2:** Stratification of BioID hits based on filtering potential contaminants

| rank | ENR | gene symbol | Golgi, Microtubules, Centrosome | Survived strict filter | accession | spectral counts control | spectral counts 1 | spectral counts 2 (primary ranking) | detection with BirA* fused to the N-terminus of CDC10/2 bait (spectral counts) | description                                                                                            | localization (relevant function/focalization)                | contaminant repository | nuclear pore | light junction |
|------|-----|-------------|---------------------------------|------------------------|-----------|-------------------------|-------------------|-------------------------------------|--------------------------------------------------------------------------------|--------------------------------------------------------------------------------------------------------|--------------------------------------------------------------|------------------------|--------------|----------------|
| 1    | ✓   | CDC10       | ✓                               | ✓                      | Q81Y73    | 0                       | 385               | 874.5                               | 986                                                                            | Coiled coil domain-containing protein 170 OS=Homo sapiens GN=CCDC170 PE=1 SV=3                         |                                                              |                        |              |                |
| 4    | ✓   | PCMI1       | ✓                               | ✓                      | Q13154    | 0                       | 26.5              | 19                                  | ✓ (16)                                                                         | Pericentriolar material 1 protein OS=Homo sapiens GN=PCMI1 PE=1 SV=4                                   | Centrosome                                                   | 31/411                 | n            | n              |
| 9    | ✓   | SEC14A      | ✓                               | ✓                      | Q15027    | 0                       | 8                 | 24.5                                | n                                                                              | Protein transport protein Sec14A OS=Homo sapiens GN=SEC14A PE=1 SV=3                                   | Golgi and cytoplasm                                          | 41/411                 | n            | n              |
| 12   | ✓   | TUBA4A      | ✓                               | ✓                      | P08265    | 0                       | 0                 | 18                                  | ✓ (159)                                                                        | Tubulin alpha-4A chain OS=Homo sapiens GN=TUBA4A PE=1 SV=2                                             | Microtubules                                                 | 177/411                | n            | n              |
| 13   | ✓   | ENK1        | ✓                               | ✓                      | Q8H262    | 0                       | 0                 | 17.5                                | n                                                                              | WASH domain-interacting C/EBP family member OS=Homo sapiens GN=ENK1 PE=1 SV=3                          | Golgi (membrane) and cytoplasm                               | 44/411                 | n            | n              |
| 14   | ✓   | APC         | ✓                               | ✓                      | P20504    | 0                       | 0                 | 17.5                                | n                                                                              | Adenomatous polyposis coli protein OS=Homo sapiens GN=APC PE=1 SV=2                                    | Microtubules                                                 | 18/411                 | n            | n              |
| 18   | ✓   | HSP41L      | ✓                               | ✓                      | P19411    | 0                       | 0                 | 14                                  | n                                                                              | Heat shock 70 kDa protein 1.8B OS=Homo sapiens GN=HSP41L PE=1 SV=2                                     | Cytoplasm (heat shock proteins)                              | 189/411                | n            | n              |
| 19   | ✓   | MAEA        | ✓                               | ✓                      | P27814    | 0                       | 2.5               | 13                                  | ✓ (16)                                                                         | Microtubule-associated protein 4 OS=Homo sapiens GN=MAEA PE=1 SV=3                                     | Microtubules                                                 | 86/411                 | n            | n              |
| 27   | ✓   | CALD1       | ✓                               | ✓                      | Q05482    | 0                       | 7.5               | 8.5                                 | ✓ (22)                                                                         | Caldesmon OS=Homo sapiens GN=CALD1 PE=1 SV=3                                                           | Actin- and myosin binding                                    | 55/411                 | n            | n              |
| 29   | ✓   | MYH9        | ✓                               | ✓                      | P15179    | 0                       | 8                 | 8.5                                 | ✓ (73)                                                                         | Myosin 9 OS=Homo sapiens GN=MYH9 PE=1 SV=4                                                             | Centrosome                                                   | 201/411                | n            | n              |
| 30   | ✓   | ALMS1       | ✓                               | ✓                      | Q81Y14    | 0                       | 3                 | 8                                   | ✓ (6)                                                                          | Autism syndrome protein 1 OS=Homo sapiens GN=ALMS1 PE=1 SV=3                                           | Cytoplasm, Actin filaments (Motor protein)                   | 17/411                 | n            | n              |
| 32   | ✓   | CRK         | ✓                               | ✓                      | P46108    | 0                       | 6                 | 7.5                                 | n                                                                              | Adapter molecule crk OS=Homo sapiens GN=CRK PE=1 SV=2                                                  | Plasma membrane (oncogene adapter protein)                   | 26/411                 | y            | y              |
| 37   | ✓   | CEP170      | ✓                               | ✓                      | Q50W79    | 0                       | 5.5               | 7                                   | ✓ (6)                                                                          | Centrosomal protein of 170 kDa OS=Homo sapiens GN=CEP170 PE=1 SV=1                                     | Centrosome                                                   | 46/411                 | n            | n              |
| 39   | ✓   | LMNB1       | ✓                               | ✓                      | Q9P9D0    | 0                       | 2.5               | 7                                   | n                                                                              | LIM and capbin homolog domains-containing protein 1 OS=Homo sapiens GN=LMNB1 PE=1 SV=4                 | Cytoplasm                                                    | 22/411                 | n            | n              |
| 38   | ✓   | VIM         | ✓                               | ✓                      | P08870    | 0                       | 4.5               | 7                                   | ✓ (12)                                                                         | Vimentin OS=Homo sapiens GN=VIM PE=1 SV=4                                                              | Cytoskeleton (intermediate filaments)                        | 257/411                | n            | y              |
| 46   | ✓   | ACTG1       | ✓                               | ✓                      | Q95155    | 0                       | 0                 | 6.5                                 | ✓ (2)                                                                          | Actin, alpha skeletal muscle OS=Homo sapiens GN=ACTA1 PE=1 SV=3                                        | Cytoskeleton                                                 | 154/411                | n            | n              |
| 47   | ✓   | ACTG2       | ✓                               | ✓                      | P63267    | 0                       | 0                 | 6.5                                 | n                                                                              | Actin, gamma-smooth muscle OS=Homo sapiens GN=ACTG2 PE=1 SV=1                                          | Cytoskeleton                                                 | 153/411                | n            | n              |
| 48   | ✓   | ACTC1       | ✓                               | ✓                      | P88912    | 0                       | 0                 | 6.5                                 | ✓ (67)                                                                         | Actin, alpha cardiac muscle 1 OS=Homo sapiens GN=ACTC1 PE=1 SV=1                                       | Cytoskeleton                                                 | 154/411                | n            | n              |
| 49   | ✓   | ACTG3       | ✓                               | ✓                      | P92736    | 0                       | 0                 | 6.5                                 | ✓ (67)                                                                         | Actin, smooth muscle OS=Homo sapiens GN=ACTA3 PE=1 SV=1                                                | Cytoskeleton                                                 | 151/411                | n            | n              |
| 54   | ✓   | GAPVD1      | ✓                               | ✓                      | Q14C86    | 0                       | 1                 | 6                                   | n                                                                              | GTPase-activating protein and VPS9 domain-containing protein 1 OS=Homo sapiens GN=GAPVD1 PE=1 SV=2     | Cytoplasm                                                    | 31/411                 | n            | n              |
| 55   | ✓   | PLDWB2      | ✓                               | ✓                      | Q89450    | 0                       | 3.5               | 6                                   | n                                                                              | Phosphatidylinositol 3-OH kinase class II domain family B member 2 OS=Homo sapiens GN=PLDWB2 PE=1 SV=2 | Cytoplasm                                                    | 19/411                 | n            | n              |
| 63   | ✓   | HAI5G6      | ✓                               | ✓                      | Q72497    | 0                       | 3.5               | 4.5                                 | n                                                                              | HAI5 suppressor-like complex subunit 4 OS=Homo sapiens GN=HAI5G6 PE=1 SV=2                             | Centrosome                                                   | 22/411                 | n            | n              |
| 65   | ✓   | TNS3        | ✓                               | ✓                      | Q68222    | 0                       | 7                 | 4.5                                 | ✓ (6)                                                                          | Tensin 3 OS=Homo sapiens GN=TNS3 PE=1 SV=2                                                             | Focal adhesions                                              | 11/411                 | n            | n              |
| 66   | ✓   | FAM21B      | ✓                               | ✓                      | Q55476    | 0                       | 2.5               | 4.5                                 | n                                                                              | WASH complex subunit FAM21B OS=Homo sapiens GN=FAM21B PE=1 SV=2                                        | Vesicles                                                     | 24/411                 | n            | n              |
| 68   | ✓   | ARFGAP1     | ✓                               | ✓                      | Q8N073    | 0                       | 1.5               | 4.5                                 | ✓ (2)                                                                          | ADP-ribosylation factor GTPase-activating protein 1 OS=Homo sapiens GN=ARFGAP1 PE=1 SV=2               | Golgi                                                        | 24/411                 | n            | n              |
| 69   | ✓   | EXOC4       | ✓                               | ✓                      | Q96A65    | 0                       | 0                 | 4.5                                 | ✓ (3)                                                                          | Exocyst complex component 4 OS=Homo sapiens GN=EXOC4 PE=1 SV=1                                         | Vesicles                                                     | 43/411                 | n            | n              |
| 64   | ✓   | FAM21A      | ✓                               | ✓                      | Q54102    | 0                       | 2.5               | 4.5                                 | n                                                                              | WASH complex subunit FAM21A OS=Homo sapiens GN=FAM21A PE=1 SV=1                                        | Vesicles                                                     | 24/411                 | n            | n              |
| 74   | ✓   | MISP        | ✓                               | ✓                      | Q8V722    | 0                       | 3                 | 4                                   | n                                                                              | Mitotic interactor and substrate of PLK1 OS=Homo sapiens GN=MISP PE=1 SV=1                             | Plasma membrane                                              | 20/411                 | n            | n              |
| 75   | ✓   | CKAP5       | ✓                               | ✓                      | Q14008    | 0                       | 1                 | 4                                   | n                                                                              | Cytoskeleton-associated protein 5 OS=Homo sapiens GN=CKAP5 PE=1 SV=3                                   | Cytoplasm (microtubule assembly)                             | 84/411                 | n            | n              |
| 77   | ✓   | TRIOBP2     | ✓                               | ✓                      | P71802    | 0                       | 0.5               | n                                   | ✓ (3)                                                                          | Tripartite 2 OS=Homo sapiens GN=TRIOBP2 PE=1 SV=1                                                      | Cytoskeleton (Actin filament binding)                        | 116/411                | n            | n              |
| 80   | ✓   | SRP22       | ✓                               | ✓                      | Q76094    | 0                       | 0.5               | n                                   | ✓                                                                              | Signal recognition particle subunit SRP22 OS=Homo sapiens GN=SRP22 PE=1 SV=3                           | Cytoplasm (signal recognition particle)                      | 65/411                 | n            | n              |
| 83   | ✓   | DAB2        | ✓                               | ✓                      | P90982    | 0                       | 2                 | 3.5                                 | n                                                                              | Disabled homolog 2 OS=Homo sapiens GN=DAB2 PE=1 SV=3                                                   | Vesicles                                                     | 13/411                 | n            | n              |
| 86   | ✓   | CLINT1      | ✓                               | ✓                      | Q14677    | 0                       | 0.5               | 3.5                                 | n                                                                              | Clastrin interactor 1 OS=Homo sapiens GN=CLINT1 PE=1 SV=1                                              | Vesicles (Golgi)                                             | 40/411                 | n            | n              |
| 97   | ✓   | SKA3        | ✓                               | ✓                      | Q8X90     | 0                       | 0.5               | 3.5                                 | n                                                                              | Spindle and kinetochore associated protein 3 OS=Homo sapiens GN=SKA3 PE=1 SV=2                         | Cytoplasm                                                    | 15/411                 | n            | n              |
| 92   | ✓   | ARL19       | ✓                               | ✓                      | Q14639    | 0                       | 0                 | 2.5                                 | n                                                                              | Actin-binding LIM protein 1 OS=Homo sapiens GN=ARL19 PE=1 SV=2                                         | Cytoplasm                                                    | 29/411                 | n            | n              |
| 95   | ✓   | ARHGAP21    | ✓                               | ✓                      | Q15743    | 0                       | 0.5               | 3.5                                 | ✓ (6)                                                                          | Rho GTPase-activating protein 21 OS=Homo sapiens GN=ARHGAP21 PE=1 SV=1                                 | Cytoskeleton (Actin filaments, recruited to Golgi membranes) | 21/411                 | n            | n              |
| 112  | ✓   | AKAP9       | ✓                               | ✓                      | Q59996    | 0                       | 1                 | 3                                   | ✓ (5)                                                                          | A-kinase anchor protein 9 OS=Homo sapiens GN=AKAP9 PE=1 SV=3                                           | Golgi                                                        | 5/411                  | n            | n              |
| 122  | ✓   | CEP152      | ✓                               | ✓                      | Q94886    | 0                       | 0                 | 3                                   | n                                                                              | Centrosomal protein of 152 kDa OS=Homo sapiens GN=CEP152 PE=1 SV=4                                     | Centrosome                                                   | 6/411                  | n            | n              |
| 126  | ✓   | COPA        | ✓                               | ✓                      | P53621    | 0                       | 1.5               | 2.5                                 | ✓ (23)                                                                         | Cotaxin subunit alpha OS=Homo sapiens GN=COPA PE=1 SV=2                                                | Golgi                                                        | 86/411                 | n            | n              |
| 143  | ✓   | CLDC14      | ✓                               | ✓                      | Q94988    | 0                       | 0                 | 2.5                                 | n                                                                              | Coiled coil domain-containing protein 14 OS=Homo sapiens GN=CLDC14 PE=1 SV=2                           | Centrosome                                                   | 2/411                  | n            | n              |
| 136  | ✓   | DNCE1L1     | ✓                               | ✓                      | Q14504    | 0                       | 1.5               | 2.5                                 | ✓ (20)                                                                         | Cytoplasmic Dyx1c1 heavy chain 1 OS=Homo sapiens GN=DNCE1L1 PE=1 SV=2                                  | Cytoplasm, Centrosome (Microtubule motor protein)            | 131/411                | n            | n              |
| 139  | ✓   | EPFL1       | ✓                               | ✓                      | P58107    | 0                       | 1.5               | 2.5                                 | ✓ (21)                                                                         | Epilysin OS=Homo sapiens GN=EPFL1 PE=1 SV=2                                                            | Cytoskeleton                                                 | 126/411                | n            | n              |
| 142  | ✓   | KIF5A       | ✓                               | ✓                      | Q00139    | 0                       | 0.5               | 2.5                                 | n                                                                              | Kinesin-like protein 52A OS=Homo sapiens GN=KIF5A PE=1 SV=3                                            | Cytoskeleton (Microtubule motor protein, Centrosome)         | 18/411                 | n            | n              |
| 149  | ✓   | KIF5B       | ✓                               | ✓                      | P13176    | 0                       | 0                 | 2.5                                 | ✓ (13)                                                                         | Kinesin-1 heavy chain OS=Homo sapiens GN=KIF5B PE=1 SV=1                                               | Cytoskeleton (Microtubule motor protein, Centrosome)         | 97/411                 | n            | n              |
| 153  | ✓   | BOD1L1      | ✓                               | ✓                      | Q8NFC6    | 0                       | 0                 | 2.5                                 | ✓ (6)                                                                          | Biorientation of chromosomes in cell division protein 1 like 1 OS=Homo sapiens GN=BOD1L1 PE=1 SV=2     | Nucleus                                                      | 37/411                 | n            | n              |
| 166  | ✓   | LMNA1       | ✓                               | ✓                      | Q9U886    | 0                       | 1                 | 2                                   | ✓ (2)                                                                          | LIM domains and actin-binding protein 1 OS=Homo sapiens GN=LMNA1 PE=1 SV=1                             | Cytoskeleton, Actin filaments                                | 76/411                 | n            | n              |
| 170  | ✓   | CAMSAP2     | ✓                               | ✓                      | Q6T3Y3    | 0                       | 0.5               | 2                                   | ✓ (9)                                                                          | Calmodulin-regulated spectrin-associated protein 2 OS=Homo sapiens GN=CAMSAP2 PE=1 SV=3                | Nucleus                                                      | 24/411                 | n            | n              |
| 174  | ✓   | CAMSAP1     | ✓                               | ✓                      | Q8R401    | 0                       | 1                 | 2                                   | n                                                                              | Calmodulin-regulated spectrin-associated protein 1 OS=Homo sapiens GN=CAMSAP1 PE=1 SV=3                | Microtubule ends                                             | 16/411                 | n            | n              |
| 179  | ✓   | CASC2       | ✓                               | ✓                      | Q9N031    | 0                       | 0                 | 2                                   | n                                                                              | Protein CASC2 OS=Homo sapiens GN=CASC2 PE=1 SV=3                                                       | Nucleus                                                      | 24/411                 | n            | n              |
| 181  | ✓   | RTN4        | ✓                               | ✓                      | Q9N0C3    | 0                       | 0                 | 2                                   | n                                                                              | Reticulon 4 OS=Homo sapiens GN=RTN4 PE=1 SV=2                                                          | Endoplasmic reticulum                                        | 64/411                 | n            | n              |
| 191  | ✓   | GAIPB3      | ✓                               | ✓                      | Q9N044    | 0                       | 0                 | 2                                   | ✓ (6)                                                                          | Protein diaphanous homolog 3 OS=Homo sapiens GN=GAIPB3 PE=1 SV=4                                       | Microtubules                                                 | 14/411                 | n            | n              |
| 158  | ✓   | CCT         | ✓                               | ✓                      | Q9P512    | 0                       | 0                 | 2                                   | ✓ (15)                                                                         | T-complex protein 1 subunit eta OS=Homo sapiens GN=CCT PE=1 SV=2                                       | Cytoplasm (chaperone for actin and tubulin)                  | 172/411                | n            | n              |
| 159  | ✓   | CLTC        | ✓                               | ✓                      | Q90610    | 0                       | 1.5               | 2                                   | ✓ (11)                                                                         | Clastrin heavy chain 1 OS=Homo sapiens GN=CLTC PE=1 SV=5                                               | Vesicles (trans-Golgi network membranes)                     | 180/411                | n            | n              |
| 160  | ✓   | ARF3        | ✓                               | ✓                      | Q14617    | 0                       | 3.5               | 2                                   | n                                                                              | ARF-3 complex subunit delta 1 OS=Homo sapiens GN=ARF3 PE=1 SV=1                                        | Vesicles (Golgi)                                             | 73/411                 | n            | n              |
| 166  | ✓   | FAM21C      | ✓                               | ✓                      | Q9Y4E1    | 0                       | 2.5               | 2                                   | n                                                                              | WASH complex subunit FAM21C OS=Homo sapiens GN=FAM21C PE=1 SV=3                                        | Vesicles                                                     | 24/411                 | n            | n              |
| 187  | ✓   | CCT4        | ✓                               | ✓                      | P50991    | 0                       | 0                 | 2                                   | ✓ (14)                                                                         | T-complex protein 1 subunit delta OS=Homo sapiens GN=CCT4 PE=1 SV=4                                    | Cytoplasm (Chaperone for actin and tubulin)                  | 186/411                | n            | n              |
| 192  | ✓   | NONO        | ✓                               | ✓                      | Q15113    | 0                       | 0                 | 2                                   | ✓ (13)                                                                         | Non-POU domain-containing octamer-binding protein OS=Homo sapiens GN=NONO PE=1 SV=4                    | Nucleus                                                      | 200/411                | y            | y              |
| 203  | ✓   | PFN1        | ✓                               | ✓                      | P07337    | 0                       | 1                 | 1.5                                 | ✓ (20)                                                                         | Profilin 1 OS=Homo sapiens GN=PFN1 PE=1 SV=2                                                           | Cytoplasm (Actin-binding)                                    | 148/411                | n            | n              |
| 205  | ✓   | NAT10       | ✓                               | ✓                      | Q9N040    | 0                       | 4.5               | 1.5                                 | ✓ (23)                                                                         | Nucleolar translocator 10 OS=Homo sapiens GN=NAT10 PE=1 SV=2                                           | Nucleus                                                      | 70/411                 | n            | n              |
| 206  | ✓   | COPG1       | ✓                               | ✓                      | Q91978    | 0                       | 2.5               | 0.5                                 | ✓ (2)                                                                          | Cotaxin subunit gamma 1 OS=Homo sapiens GN=COPG1 PE=1 SV=1                                             | Vesicles (Golgi)                                             | 76/411                 | n            | n              |
| 207  | ✓   | COPG2       | ✓                               | ✓                      | Q9U8F2    | 0                       | 2.5               | 0.5                                 | ✓ (6)                                                                          | Cotaxin subunit gamma 2 OS=Homo sapiens GN=COPG2 PE=1 SV=1                                             | Vesicles (Golgi)                                             | 67/411                 | y            | n              |
| 208  | ✓   | CCT5        | ✓                               | ✓                      | P48643    | 0                       | 2.5               | 0                                   | ✓ (11)                                                                         | T-complex protein 1 subunit epsilon OS=Homo sapiens GN=CCT5 PE=1 SV=1                                  | Cytoplasm (Chaperone for actin and tubulin)                  | 181/411                | n            | n              |

Red - Suspected major contaminant

Black Bold - survived strict filter

Black - did not survive strict filtering (detected in unrelated nuclear data sets, not shown)

**Table S3:** Final BioID hits

| protein | relevant localization or function | source of localization/functional information: Human Protein Atlas (HPA), GeneCards (GC), or primary literature |
|---------|-----------------------------------|-----------------------------------------------------------------------------------------------------------------|
| PCM1    | Centrosome                        | HPA                                                                                                             |
| SEC16A  | Golgi and cytoplasm               | HPA                                                                                                             |
| ERC1    | Golgi (mouse) and cytoplasm       | HPA                                                                                                             |
| APC     | Microtubules                      | Mimori-Kiyosue Y, Shiina N, Tsukita S. J Cell Biol. 2000 148:505-18.                                            |
| MAP4    | Microtubules                      | HPA                                                                                                             |
| CALD1   | Actin- and myosin-binding         | HPA                                                                                                             |
| ALMS1   | Centrosome                        | HPA                                                                                                             |
| CEP170  | Centrosome                        | HPA                                                                                                             |
| LIMCH1  | Cytoplasm                         | HPA(Cytoplasm), GC (Actin binding)                                                                              |
| GAPVD1  | Cytoplasm                         | HPA                                                                                                             |
| PHLDB2  | Cytoplasm                         | HPA (Cytoplasm), GC (Microtubule regulation)                                                                    |
| HAUS6   | Centrosome                        | HPA                                                                                                             |
| TNS3    | Focal adhesions                   | HPA                                                                                                             |
| FAM21B  | Vesicles                          | HPA                                                                                                             |
| ARFGAP1 | Golgi                             | HPA                                                                                                             |
| EXOC4   | Vesicles                          | HPA (Nucleus), GC (Vesicles)                                                                                    |
| MISP    | Plasma membrane                   | HPA                                                                                                             |
| CKAP5   | Cytoplasm (Microtubule assembly)  | HPA, Al-Bassam J, Chang F. Trends Cell Biol. 2011 21:604-14.                                                    |
| DAB2    | Vesicles                          | HPA                                                                                                             |
| CLINT1  | Vesicles (Golgi)                  | HPA (Vesicles), GC (Golgi)                                                                                      |
| SKA3    | Cytoplasm                         | HPA (Cytoplasm), GC (Kinetochore-microtubule interface)                                                         |
| ABLIM1  | Cytoplasm                         | HPA (Cytoplasm), GC (Actin filament binding)                                                                    |
| AKAP9   | Golgi                             | HPA (Golgi), GC (Centrosome)                                                                                    |
| CEP152  | Centrosome                        | HPA                                                                                                             |
| COPA    | Golgi                             | HPA                                                                                                             |
| CCDC14  | Centrosome                        | HPA                                                                                                             |
| LIMA1   | Actin filaments                   | HPA                                                                                                             |
| CAMSAP1 | Microtubules                      | GC                                                                                                              |
| CAMSAP2 | Microtubule ends                  | HPA                                                                                                             |
| CASC5   | Nucleus                           | HPA (Nucleus), GC (Kinetochore-microtubule attachment)                                                          |
| RTN4    | Endoplasmic reticulum             | HPA                                                                                                             |
| DIAPH3  | Microtubules                      | HPA                                                                                                             |

RED- Golgi 6

GREEN - Microtubules 6

BLUE - Centrosome 6

BLACK - Other 14
